# Supplementary material for: Impact of climate change on water resources in a tropical West African catchment using an ensemble of climate simulations
Source: Copernicus journal article supplement (doi:10.5194/hess-2016-387), 2016-09-07
Supplement: Supplementary file [file hess-2016-387-AC1-supplement.pdf]

**Comments are highlighted in blue and responses are provided directly after each comment.**

1. The paper presents a study about the impact of climate change on water resources in a small catchment in West Africa. It is generally well written and presents interesting findings. The methodology is, with the exception of the new interpolation method, standard and also the results are in line with most other studies in West Africa and analysis of Cordex Africa for West Africa, projecting huge uncertainty even in the direction of trend. The novelty of the study, mentioned by the authors, is the small catchments size.

Thanks.

2. The paper has two major shortcomings and some minor issues. The newly introduced method of using single projections of a grid that surround the actual catchment is new and not justified in the article. Why was no standard interpolation or 9-point filter method used? The climate input of a square of 250 km x 200 km is used to assess the impact in a 18 x 11 km catchment without explaining the theoretical background of the approach or showing that the climatic differences do not affect the hydrology.

Following this useful comment, two supplementary materials (figures) have been provided (see below): (i) Supp\_Fig. 1 shows for each climate product, the hydrological outcomes of all 20 nodes, and (ii) Supp\_Fig.2 compares precipitations retrieved from RCMs-GCMs using the 20 nodes approach and the standard 3x3 average approach.

In regions characterized by local convective rainfall patterns as in the investigated area, interpolation (e.g. averaging, Kriging, IDW or others) increases the number of rainy days, decreases mean intensities (see Supp\_Fig. 2) and therefore influences the runoff components and actual evapotranspiration. As shown by Supp\_Fig. 2, the RCMs-GCMs considerably overestimated rainy days, and interpolation (3x3 average method is used for illustrative purpose) exacerbates this overestimation of rainy days. Proceeding as we did, allows overcoming the drizzle effect resulting from interpolation. However, we do recognize that considering a 5x4 nodes necessarily increase the scale gap between the modeling domain and RCM domain, but as pointed out by Referee1 and supported by other authors (e.g. Kapper et al., 2009; Grasso, 2000, Villani et al. 2015, etc.) up to to a 7  $\Delta x$  RCM resolution may be required for an effective resolution value depending on the atmospheric parameters. The adoption of our approach constitutes, in this respect, an uncertainty element to take into account, keeping in mind that interpolating neighboring grid boxes necessarily increases the scale gap if the target resolution is of sub-grid scale (Maraun, 2013).

Grasso, L. D., 2000. The differentiation between grid spacing and resolution and their application to numerical modeling. Bull. Amer. Meteorol. Soc. 81(3), 579-580.

Kapper, K.L., 2009. Scale sensitive analysis of regional climate models. Scientific Report No.. 29, Wegener Center Verlag Graz, ISBN 978-3-9502615-6-1.

Maraun, D., 2013. Bias Correction, Quantile Mapping, and Downscaling: Revisiting the Inflation Issue. J. Clim. 26, 2137–2143. doi:10.1175/JCLI-D-12-00821.1

Villani, V., Rianna, G., Mercogliano, P., Zollo, A.L., Schiano, P., 2014. Statistical approaches versus weather generator to downscale RCM outputs to point scale: A comparison of performances. J. Urban Environ. Eng. 8, 142.

3. Another study is cited (Yira et al. 2016), which analysed the impacts of Land use and land cover changes on the hydrology. These results would be very interesting when talking about climate change impacts and I suggest to include them in the discussion of the paper.

We do agree with Referee1 about this comment. However, Yira et al. (2016) explored historical land use change impact on water resources in the Dano catchment. It assessed land use

dynamic in the catchment over the period 1990-2013 and used land use scenarios to quantify the impact of the observed land use dynamic on water resources.

A clear historical trend in land conversion (from savannah to cropland) was observed but a clear spatial pattern in land conversion could not be established.

Projected land use and land cover map for the period 2021-2050 is necessary in order to consistently integrated land use change to the projected climate scenarios for the period 2021-20150, and such a map is not available for the Dano catchment.

We learned from Yira et al. (2016) that land conversion as it took place in the catchment over the past decades led to an increase in discharge and decrease in actual evapotranspiration. It is this result that was put into perspective with the results of the current study.

#### 4. All other comments are added directly into the PDF.

Our point-to-point replies to the specific comments are provided below.

#### 5. Ecohydrological analysis [...]. Not clear, all analysis of the study are ecohydrologic. Please clarify.

We changed this sentence in the abstract with “A water-energy budget analysis provides further insight into the behavior of the catchment”.

#### 6. Some GCMs do not generate the WAM at all. Which ones? Four lines before you state "Confidence [...] relies on their ability to simulate [...]." Please clarify.

Examples of models failing to reproduce the WAM reported by Cook and Vizzy (2006) include “the Commonwealth Scientific and Industrial Research Organisation (CSIRO), one of the Goddard Institute for Space Studies models (GISS\_ER), ECHAM5, the Community Climate System Model (CCSM), the Parallel Climate Model (PCM), and the Hadley Centre Coupled Model (HadCM) integrations”.

#### 7. However, a limited number of studies have used multi-climate model data sets (Kasei, 2009; Ruelland et al., 2012); I disagree. Many studies used an ensemble approach, especially for West Africa. See Roudier et al. 2014 for a review and recently Aich et al. 2016, showing several studies.

Roudier et al.: Climate change impacts on runoff in West Africa: a review, HESS, 2016.

Aich et al.: Flood projections within the Niger River Basin under future land use and climate change. STOTEN 2016.

Indeed Roudier et al. 2014 and Aich et al. 2016 provide additional studies that used an ensemble approach. This sentence of the manuscript was changed and the suggested two references have been added as sources of multi-climate model studies.

#### 8. [...].the novelty of the study includes the use of an ensemble of climate simulations and an ecohydrological analysis. No novelty, see above.

This section was changed: The application of an ensemble of climate simulations was excluded from the sentence.

#### 9. Why did you not use more of the available cordex Africa combinations and how were these six selected?

The limitation of climate datasets to 6 (all randomly selected), results from the running time required for the hydrological simulation approach. As each RCM node is run separately, 60 runs are necessary for each climate model, and this is time consuming. Nevertheless, the six datasets cover the range of future climate reported for West Africa.

10. Please see main comment. This should be changed to a standard 9-point filter approach (Grasso 2000) or a figures should show the different hydrological outcomes for the corner and the center something similar.

Grasso: The differentiation between grid spacing and resolution and their application to numerical modelling. Bull. Am. Meteorol. Soc, 2000.

Please see our response to comment 2.

11. [...] for the period of 2011-2014. Very short period, should be mentioned in the discussion about uncertainty.

We do agree that this period is relatively short, but this results from the fact that the study was carried out in a data-scarce area. Mentioning it under the section method brings valuable information about how the results were obtained.

Why only one (GCM-RCM)? Even if randomly selected could all other 5 be differently affected. This limitation also results from the model running time.

12. Results. The presentation of the results is not in accordance to the questions in the introduction. In order to make the paper easier to read this should be streamlined.

Questions in the introduction and Results were streamlined as recommended.

13. Hence, the bias correction impact on discharge change signal alteration can be considered negligible. At the end of the paragraph above you mention that poor quality is achieved by non bias-corrected runs. How does this fit?

Two different things are presented in both paragraphs: (i) difference in discharge with BC climate data is compared to difference in discharge with non BC climate data, (ii) in the previous paragraph, historical discharge with non BC climate data is compared to observation-based discharge. Both are not related *per se*. Simulated discharges with non bias corrected climate data failed to reproduce historical river flow regime, however discharge change with bias corrected and non bias corrected climate data show similar trends.

14. [...] change in total discharge cannot be strongly related to change in potential evapotranspiration. This might be a calibration problem. How well is evapotranspiration reproduced?

That there is not strong correlation between annual ETp and annual discharge can be explained (i) by the fact that ETa is limited by water availability and not by energy and (ii) that the distribution of ETp over the rainy and dry season is important. An increase of ETp in the dry season does not influence ETa because of water shortage. The fact that total discharge could not be strongly related to change in ETp is not specific to our finding as this is also confirmed by the review after Roudier et al. (2014).

15. Climate change signal. I suggest to include also analysis of the climate observations you used in order to see, which direction climate change took so far in the catchment.

Many thanks for this suggestion. Waongo (2015), used the same observation data set and reported an average +0.31°C/decade and +0.17°C/decade increase for the minimum and maximum temperature respectively for the region considering the period of 1960-2010, while no clear trend is reported for precipitation. This additional information was added to the revised manuscript (L331-L334).

16. This is no justification for the method. See main comment.

Please refer to our answer to comments 2.

17. The climate models ensemble mean projects a precipitation increase of about 1.5 % under RCP8.5 with a resulting discharge decrease of 2 %. This indicates that the catchment ecosystem is able to optimize the use of water and energy available in the environment, thus reducing unused water (Pex) with temperature increase.

Are these changes significant? What do you mean with catchment ecosystem? How was this included in the model? This paragraph is not clear.

These changes are not significant (overall 3 models show a positive trend and the others 3 show a negative trend). Ecosystem here refers to the vegetation within the catchment as provided by the land use map and the associated land use parameters for each land use class. (L427-428).

18. Combining this land use change to climate change impact would therefore on the one hand aggravate water stress for plants in the catchment and on the other hand increase the unused water in the catchment.

See main comment 2 (Another study is cited (Yira et al. 2016), which analysed the impacts of Land use and land cover changes on the hydrology. These results would be very interesting when talking about climate change impacts and I suggest to include them in the discussion of the paper)

Please see our response to comments 3.

19. This result indicates that it is safe to perform bias correction; it also points out the “non-necessity” of performing bias correction in order to detect future discharge change signal in the catchment.

This is a very interesting finding. Please discuss more about scale and upscaling. Does it also hold for larger catchments or different climatic zones?

This conclusion achieved by the study, although supported by others studies carried out in different climatic zones and/or at different catchment scales (e.g. Muerth et al. 2013 and Mbaye et al. 2015), cannot be extended to others areas unless proved by a study as it is well established that bias correction can alter CC signal, and a quite large range of BC methods (leading to different outcomes) do exist. Furthermore, Bias correction can increase models consistency, quality and increase model value to the user. Therefore, it remains a valid part of the model chain.

20 .Fig. 1

In addition to the comment about the method, it would be very important to see the topography and the land cover of the 4x5 area that has been used as input for the catchment model.

Done. Please refer to supplementary materials Fig. 3 and Fig. 4 for the topography and land use and land cover map of the RCM domain respectively.

21. Fig. 2

Nice!

Thanks

22. Fig. 4

I suggest to add to Figure 3.

Done. Fig. 4 was added to Fig. 3

23. Fig. 5.

I suggest to add to Figure 3.

Fig. 5 was kept as is to avoid overloading fig. 3.

25. Fig. 8  
Scales differ.  
Done.

# Impact of climate change on water resources in a tropical West African catchment using an ensemble of climate simulations

Yacouba Yira<sup>1</sup>, Bernd Diekkrüger<sup>1</sup>, Gero Steup<sup>1</sup>, Aymar Y. Bossa<sup>2,3</sup>

<sup>1</sup>Department of Geography, University of Bonn, Meckenheimer Allee 166, 53115 Bonn, Germany

5 <sup>2</sup>West African Science Service Center on Climate Change and Adapted Land Use-WASCAL, Ouagadougou 06 P.O. Box 9507, Burkina Faso

<sup>3</sup>Department of Hydrology and Water Resources Management, National Institute of Water, University of Abomey-Calavi, Cotonou 01 P.O. Box 526, Benin

10 *Correspondence to:* Yacouba Yira (yira\_y@uni-bonn.de)

**Abstract.** This study evaluates climate change impacts on water resources using an ensemble of six Regional Climate Models (RCMs)-Global Climate Models (GCMs) in the Dano catchment (Burkina Faso). The applied climate datasets were performed in the framework of the COordinated Regional climate Downscaling Experiment (CORDEX-Africa) project.

15 After evaluation of the historical runs of the climate models ensemble, a statistical bias correction (*Empirical Quantile Mapping*) was applied to daily precipitation. Temperature and bias corrected precipitation data from the ensemble of RCMs-GCMs was then used as input for the Water flow and balance Simulation Model (WaSiM) to simulate water balance components.

The mean hydrological and climate variables for two periods (1971-2000 and 2021-2050) were compared to assess  
20 the potential impact of climate change on water resources up to the middle of the twenty-first century under two greenhouse gas concentration scenarios, the Representative Concentration Pathways (RCPs) 4.5 and 8.5. The results indicate: (i) a clear signal of temperature increase of about 0.1 to 2.6 °C for all members of the RCMs-GCMs ensemble; (ii) high uncertainty about how the catchment precipitation will evolve over the period 2021-2050; (iii) individual climate models results lead to opposite discharge change signals; (iv) the RCMs-GCMs ensemble average  
25 suggests a +7 % increase in annual discharge under RCP4.5 and a -2 % decrease under RCP8.5; (v) the applied bias correction method only affected the magnitude of climate change signal. Therefore, potential increase and decrease of future discharge has to be considered in climate change adaptation strategies in the catchment. The results further underline on the one hand the need for a larger ensemble of projections to properly estimate the impacts of climate change on water resources in the catchment and on the other hand the high uncertainty associated with climate  
30 | projections for the West African region. [A water-energy budget](#) ~~An ecohydrological~~ analysis provides further insight into the behavior of the catchment.

**Keywords:** Hydrological modeling, RCP, bias correction, West Africa, Ecohydrological analysis, WaSiM.

## 1. Introduction

Development of adaptation strategies to deal with potential impacts of climate change on hydrological systems is a considerable challenge for water resources management (Muerth et al., 2013; Piani et al., 2010). Besides being highly exposed to climate change, the West African region presents a low adaptive capacity (IPCC, 2014). Projections for the late 21st century suggest severe consequences of climate change on water resources for the region. This includes an increased risk of water stress and flood (Sylla et al., 2015; Oyerinde et al., 2014), and significant change in river discharge regimes (Aich et al., 2014; Ardoin-Bardin et al., 2009; Mbaye et al., 2015).

Rising temperatures, commonly acknowledged by regional climate models (RCMs) and global climate models (GCMs), are expected to intensify the hydrological cycle due to an increased water holding capacity of the atmosphere, leading to an increased amount of renewable fresh water resources (Piani et al., 2010). Another consequence of temperature increase ascertained by Piani et al. (2010) for some regions, is the decrease in precipitation associated with the intensification of the seasonal cycle and the frequency of extreme events. These opposite trends imply that high uncertainties are associated with predicted rising temperatures' impact on the hydrological cycle for some regions (Salack et al., 2015).

Confidence in RCMs and GCMs over West Africa relies on their ability to simulate the West African monsoon (WAM) precipitation (Klein et al., 2015). However, simulating the WAM remains challenging for both RCMs and GCMs (Cook, 2008; Druryan et al., 2009; Paeth et al., 2011; Ruti et al., 2011), as each RCM and GCM produces a version of the WAM, but with some distortion of structure and/or timing. Some GCMs ([e.g. CSIRO, GISS\\_ER, ECHAM5, CCSM](#)) do not generate the WAM at all (Cook and Vizzy, 2006). Part of this divergence is related to: (i) imperfect characterization of tropical precipitation systems; (ii) uncertain future greenhouse gas forcing; (iii) scarcity of observations over West Africa; and (iv) natural climate variability (Cook and Vizzy, 2006; Foley, 2010). The hydrological climate change signal is therefore unclear for the region. Several authors (Kasei, 2009; Paeth et al., 2011; Salack et al., 2015) observed diverging precipitation signals among models. Moreover, several models fail to accurately reproduce the historical rainfall onset, maxima, pattern, and amount of the region (Nikulin et al., 2012; Ardoin-Bardin et al., 2009).

Despite significant advances, outputs of GCMs and RCMs are still characterized by biases that challenge their direct use in climate change impact assessment (Ehret et al., 2012). Indeed, unless the precipitation from climate models are bias corrected, results from hydrological simulations are unrealistic and may lead to incorrect impact assessments (Johnson and Sharma, 2015; Teutschbein and Seibert, 2012; Ahmed et al., 2013). However, correction of climate model based simulation results does not ensure physical consistency (Muerth et al., 2013) and may affect the signal of climate change for specific regions as reported by Hagemann et al. (2011). Consequently, simulated hydrological variables using bias corrected data need to be explored in climate change impact assessment.

There is essential consensus on the necessity of performing multi (climate)-model assessments to estimate the response of the West African climate to global change (Sylla et al., 2015). Accordingly, several studies (e.g. Chen et



al., 2013; Zhang et al., 2011) emphasize the importance of using multiple climate models to account for uncertainty when assessing climate change impacts on water resources. Taking advantage of the results of the COordinated Regional climate Downscaling Experiment (CORDEX-Africa) project, this study evaluates potential climate change impacts on water resources using an ensemble of six RCMs-GCMs in the Dano catchment in Burkina Faso. The catchment experiences seasonally limited water availability, and like other catchments of the region, it has experienced the severe droughts of the 1970s (Kasei et al., 2009) which resulted in a decline of water flow in many West African catchments.

A few studies have already investigated the impacts of projected climate change on water resources in West Africa (see Roudier et al. 2014 for a review). ~~Most~~ Many of these studies have used an approach based on hydrological models driven by a single RCM or GCM data set (e.g. Mbaye et al., 2015; Cornelissen et al., 2013; Bossa et al., 2014; Bossa et al., 2012). Therefore, uncertainty related to the choice of the climate model was not explicitly evaluated. However, ~~a limited other number of~~ studies have used multi-climate model data sets (Kasei, 2009; Ruelland et al., 2012, Aich et al. 2016); most of these studies have resulted in a diverging projected hydrological change signal. Climate model outputs have often been bias corrected to fit the historical climate variables and then used as input for hydrological models but few have investigated the necessity of performing such corrections in detecting the signal of future climate change impacts on water resources.

The current study aims to investigate the future climate change impacts on the hydrology of the Dano catchment in Burkina Faso, thus contributing to the management of water resources in the region. Besides the small scale of the catchment that implies addressing scale issues, the novelty of the study includes ~~the use of an ensemble of climate simulations and an ecohydrological~~ a water-energy budget analysis. Specifically, it has the following objectives: (i) evaluate the historical runs of six RCMs-GCMs at the catchment scale; (ii) analyze the climate change signal for the future period of 2021-2050 compared to the reference period of 1971-2000; ~~(iii) evaluate the ability of the climate models to reproduce the historical discharge,~~ (iii) assess the impacts of climate change on the hydrology of the catchment by the middle of the 21<sup>st</sup> century, ~~and investigate the effect and necessity of bias correction on the detected signal, and~~ (iv) perform an ecohydrological analysis of the catchment under climate change. ~~evaluate the uncertainty related to the projected hydrological change signal; and (v) investigate the effect and necessity of bias correction on the detected signal.~~

## 2. Materials and methods

### 2.1. Study area

The study was carried out in Dano catchment covering a total area of 195 km<sup>2</sup> in the Ioba province of Southwestern Burkina Faso (Fig. 1). The catchment is one of the study areas of the WASCAL project (West African Science Service Center on Climate Change and Adapted Land Use, [www.wascal.org](http://www.wascal.org)); whose main target is to increase resilience of human and environmental systems to climate change.



100 The major land uses in the catchment include shifting cultivation which accounts for one third of the catchment area; natural vegetation albeit converted into agricultural and fallow lands form part of Sudanian region characterized by wooded, scrubby savannah and abundant annual grasses. Sorghum (*Sorghum bicolor*), millet (*Pennisetum glaucum*), cotton (*Gossypium hirsutum*), maize (*Zea mays*), cowpeas (*Vigna unguiculata*) and groundnut (*Arachidis hypogaea*) are the major crops cultivated in the catchment.

105 The catchment is characterized by a flat landscape with a mean slope of 2.9 % and mean altitude of 295 m above sea level. According to Schmengler (2011), mean annual temperature of 28.6 °C was recorded while mean annual rainfall ranged from 800 mm – 1200 mm for the period of 1951- 2005. The catchment receives monsoonal rains with a dry season occurring in the months of November to April while the wet season being experienced in the months of July to September. This kind of rainfall pattern limits water availability especially in the dry season hence

110 communities in the catchment are vulnerable to water scarcity since they heavily rely on surface water. *Plinthosol* characterized by a plinthite subsurface layer in the upper first meter of the soil profile accounts for 73.1 % of the soil types in the catchment, other soil types found within the catchment include *gleysol*, *cambisol*, *lixisol*, *leptosol* and *stagnosol* (WRB, 2006).

## 2.2. Climate data

115 Observed mean daily temperature and daily precipitation used in the study were collected from the national meteorological service of Burkina Faso (DGM). The dataset covers the reference period of 1971-2000. Although the national observation network includes several rainfall gauges and synoptic stations, solely the data of the Dano station were used as it is located in the study area.

An ensemble of six RCM-GCM datasets is exploited in the study (Table 1). The RCM-GCM simulations were

120 performed in the framework of the CORDEX-Africa project. The datasets were produced by three RCM groups (CCLM: Climate Limited-area Modelling Community, Germany; RACMO22: Royal Netherlands Meteorological Institute, Netherlands; HIRHAM5: Alfred Wegener Institute, Germany) using the boundary conditions of four GCMs (CNRM-CM5, EC-EARTH, ESM-LR, NorESM-M). Each dataset consists of historical runs and projections based on the emission scenarios RCP4.5 and RCP8.5 (Moss et al., 2010). The retrieved data (precipitation and

125 temperature) range from 1971-2000 for the historical runs and 2021-2050 for the RCPs. An extent of 20 nodes of the African CORDEX domain, surrounding the catchment, was delineated to simulate the catchment's climate and consider climate variability in the catchment region ([Fig. 1 B](#)).

Due to the discrepancy between the RCM-GCM data resolution (0.44°, about 50 \* 50 km<sup>2</sup>) and the hydrological modeling domain (about 18 \* 11 km<sup>2</sup>) the data of each node were separately used as climate input for the

130 hydrological simulation model. Therefore, for each period (historical and projected scenarios) 20 simulations corresponding to the 20 nodes are performed per RCM-GCM. Monthly water balance for each RCM-GCM is then calculated as arithmetic mean.

### 2.3. Bias correction of precipitation data

The RCMs-GCMs ensemble was evaluated to get an estimate of the historical simulated variables for the catchment by comparing RCMs-GCMs based simulations of historical climate variables to the observations provided by the National Meteorological Service (DGM). As presented in section 3.1, whereas temperature simulated by the models ensemble enveloped the observed temperature with moderate deviation, precipitation simulated by individual RCM-GCM exhibited biases such as overestimation of annual precipitation as well as misrepresentation of the timing of the rainy season. A precipitation bias correction was therefore applied to the six RCMs-GCMs following the non-parametric quantile mapping using the empirical quantiles method (Gudmundsson et al.; 2012). For each member, a transfer function was derived using observed and modeled precipitation for the period of 1971-2000; afterwards the transfer function was applied to the projected climate scenarios (period 2021-2050).

### 2.4. Hydrological modeling

Observed and RCMs-GCMs based (historical runs and projections) data were used as climate input for version 9.05.04 of the Water flow and balance Simulation Model (WaSiM) (Schulla, 2014). WaSiM is a deterministic and spatially distributed model, which uses mainly physically based approaches to describe hydrological processes. The model configuration as applied in this study is shown in Table 2. Schulla (2014) gives more details of the model structure and processes in the Model Description Manual.

A previous study confirmed the suitability of WaSiM to model the hydrology of the Dano catchment. Details of the model setup and parameterization are available in that study (Yira et al., 2016). Briefly summarized, the model was calibrated and validated using discharge, soil moisture and groundwater depth for the period of 2011-2014. Daily time steps and a regular raster-cell size of 90 m were used. Minimum values of 0.7 for Pearson product-moment-correlation-coefficient, Nash Sutcliffe Efficiency (Nash and Sutcliffe, 1970) and Kling-Gupta Efficiency (Gupta et al., 2009; Kling et al., 2012) were achieved during the calibration and validation using observed discharge. Soil moisture and groundwater dynamics were also well simulated by the model ( $R^2 > 0.6$ ). Therefore, no further model calibration was done in the current study.

No hydrologic observations (discharge, soil moisture and groundwater level) are available for the reference period (1971-2000) in the catchment. The expected climate change for an RCM-GCM is therefore expressed as the relative difference between simulated hydrological variables under reference period (1971-2000) and future period (2021-2050).

Nevertheless, discharge simulated with RCM-GCM historical runs (bias corrected and not bias corrected) were compared to the discharge obtained with observed historical climate data. RCM-GCM based simulations able to reproduce the runoff regime of the past were used for climate change impact assessment. These comparison runs (performed with CCLM-ESM) showed that bias correction was necessary for RCMs-GCMs based simulations to reproduce the historical discharge regime. Hydrological variables simulated under historical (1971-2000) and projected (2021-2050) climate conditions were therefore compared with bias corrected RCMs-GCMs data. To

integrate the potential effect of bias correction on climate change signal as raised by different authors (e.g. Muerth et al., 2013; Ehret et al., 2012; Hagemann et al., 2011), the hydrological model was also run with not bias corrected future climate for CCLM-ESM (which was randomly selected among the 6 RCMs-GCMs).

## 2.5. Ecohydrologic analysis

A concept of water-energy budget (Tomer and Schilling, 2009; Milne et al., 2002) was applied to estimate the effectiveness of water and energy use by the catchment as it undergoes climate change. While experiencing climate change, a trend towards the optimization of total unused water- $P_{ex}$  (1) and energy- $E_{ex}$  (2) existing in the environment is usually observed. Plotting  $P_{ex}$  against  $E_{ex}$  allows for determining the ecohydrologic status of the catchment. The climate change signal can therefore be detected by the shift of this status. The direction of the shift indicates whether the catchment experienced water stress or increased humidity. The approach was used to test its validity in analyzing the interplay between temperature increase and precipitation change as projected by the RCMs-GCMs ensemble.

$$P_{ex} = (P - ET_a)/P \quad (1)$$

$$E_{ex} = (ET_p - ET_a)/ET_p \quad (2)$$

Where  $P$  is precipitation,  $ET_a$  and  $ET_p$  refer to actual and potential evapotranspiration respectively.

## 2.6. Assessment criteria

A set of evaluation measures was used to analyze the RCMs-GCMs historical runs, to assess model performance and to estimate the effects of different climate scenarios on hydrological variables:

- (i) *P-Factor*, measures the percentage of observed climate data covered by the RCMs-GCMs ensemble historical runs;
- (ii) the *R-factor*, indicates for an observation series, how wide the range between minimum RCM-GCM and maximum RCM-GCM for precipitation and temperature is, compared to the observation:

$$R - factor (Var) = \frac{1}{n\sigma_{Var_{obs}}} \sum_{l=1}^n (Var_{Si_{max}} - Var_{Si_{min}}) \quad (3)$$

Where  $Var$  is the climate variable (e.g. precipitation),  $n$  refers to the observations data points;  $\sigma$  is the standard deviation,  $obs$  refers to observation, and  $Si_{max}$  and  $Si_{min}$  are respectively the maximum and minimum values of the RCMs-GCMs ensemble.

- (iii) the normalized root-mean-square deviation (NRMSD), expresses the deviation of each RCM-GCM based precipitation and temperature from the observations;

(iv) the Pearson product-moment-correlation-coefficient ( $R^2$ ), the Nash Sutcliffe Efficiency (NSE) (Nash and Sutcliffe, 1970) and the Kling-Gupta Efficiency (KGE) (Gupta et al., 2009; Kling et al., 2012) assess the RCM-GCM based discharge simulations ability to reproduce discharge computed using observed climate data;

(v) change signal ( $\Delta$ ) in climate and hydrological variables (precipitation, temperature and discharge) expresses the difference between projected and historical values (4); and

$$\Delta Var = \frac{(Var_{Proj} - Var_{Ref}) \times 100}{Var_{Ref}} \quad (4)$$

Where  $Var$  is the evaluated variable (e.g. discharge),  $Proj$  = the projected period (2021-2050 under RCP4.5 and RCP8.5) and  $Ref$  = Reference or historical period (1971-2000).

(vi) the Wilcoxon (1945) rank-sum test was used to compare discharge change signal with bias corrected and not bias corrected precipitation data (for CCLM-ESM) following Muerth et al. (2013). The test evaluated the null hypothesis: “discharge change signal under bias corrected CCLM-ESM data equals discharge change signal under not bias corrected CCLM-ESM data”. The rejection of the test at 5 % implies that future discharge change under bias correction and no bias correction are significantly different. If the test is not rejected, both discharge change under bias correction and change under not bias correction yield the same result, and thus bias correction do not alter the climate change signal on projected discharge.

### 3. Results

#### 3.1. Historical runs analysis

The comparison between RCM-GCM historical runs and observations for temperature and precipitation is done for the reference period of 1971-2000 for average monthly values. The correlation coefficient is plotted against the  $NRMSD$  (Fig. 2) for a cross-comparison between RCMs-GCMs in order to assess the relative ability of each RCM-GCM to represent historical climate conditions in the catchment. The correlation coefficient for the RCM-GCM ensemble is in general higher than 0.7 for both precipitation and temperature. The highest coefficients (0.96) are scored by CCLM-ESM for temperature and HIRAM-NorESM for precipitation. The RCMs-GCMs ensemble mean outcores five members of the RCMs-GCMs ensemble with regard to temperature and precipitation (Fig. 2).

The RCMs-GCMs ensemble shows a clear deviation from observed precipitation compared to temperature (Fig. 2). HIRAM-EARTH and CCLM-EARTH present the lowest deviation for temperature and precipitation respectively. The RCMs-GCMs ensemble mean outcores four out of six RCMs-GCMs for temperature and precipitation with regards to the deviation from observed data.

Fig. 3 (A and B) shows a trend towards an overestimation of annual precipitation throughout the reference period for the RCMs-GCMs ensemble when precipitation data are not bias corrected (UC). Although the RCMs-GCMs ensemble presents a large dispersion ( $R$ -factor = 4.3) only 50 % ( $P$ -factor = 0.5) of observed precipitation is covered by the RCMs-GCMs ensemble. After bias correction (BC), the RCMs-GCMs ensemble agrees in general with the observed precipitation ( $P$ -factor = 0.8), moreover the dispersion of climate models based precipitation decreases ( $R$ -factor = 3.2).

The mean annual precipitation pattern is in general well captured by all RCMs-GCMs (Fig. 3 C and D Fig. 4). However, the climate models ensemble, when not bias corrected, covers only 50 % of monthly precipitation despite a large dispersion (Fig. 3 C Fig. 4 UC). After bias correction, the agreement between RCMs-GCMs based precipitation and observation is considerably improved (Fig. 3 D Fig. 4 BC); and the uncertainty band of the climate model is considerably reduced ( $R$ -factor = 0.1). However, a slight positive bias is still presented by the climate models ensemble.

Fig. 4 shows that the RCMs-GCMs ensemble fully captures the annual temperature pattern ( $P$ -factor = 100 %). However, a gap of up to -4 °C between some climate models and observations is noted. This translates into an  $R$ -factor reaching 8.2. On average, RACMO-EARTH shows an underestimation of temperatures throughout the year, whereas HIRAM-NorESM indicates an opposite trend.

### 3.2. Climate change signal

The RCMs-GCMs ensemble exhibits a mixed annual precipitation change signal between reference period (1971-2000) and future period (2021-2050) (Table 3). CCLM-CNRM, RAMCO-EARTH and HIRHAM-NorESM project a precipitation increase of about 2.5 to 21 % whereas CCLM-ESM and CCLM-EARTH indicate a decrease of 3 to 11 %. Bias correction has a minor impact on these signals, as the magnitude of projected precipitation increase ranges from 1 to 18 % and the decrease is around 5-13 % after bias correction.

A much more complex intra-annual precipitation change signal is projected by the climate models ensemble (Fig. 5). CCLM-CNRM and HIRHAM-NorESM, which projected an increased annual precipitation, are characterized by an increased rainfall from May to June followed by a decreased rainfall in August. RAMCO-EARTH shows an increased rainfall throughout the season except in July. The decrease in annual precipitation projected by CCLM-ESM and CCLM-EARTH is consistent throughout the entire season. The climate model ensemble consistently projects mean monthly temperature increase of about 0.1 to 2.3 °C under RCP4.5 and 0.6 to 2.5 °C under RCP8.5 leading to an increase of potential evapotranspiration for the climate models ensemble.

### 3.3. Historical discharge

RCMs-GCMs ensemble based discharges are compared to discharge simulated using observed climate data to evaluate the climate models ability to reproduce the historical discharge regime over the reference period (Fig. 6). Accordingly, performances ( $R^2$ ,  $NSE$  and  $KGE$ ) achieved by the climate models are presented in Table 4. Fig. 6 (a)

shows good agreement between (bias corrected) climate models based discharge and observation based discharge, with a trend towards discharge overestimation for some climate models (RACMO-EARTH, CCLM-EARTH and HIRAM-EARTH). All climate models show good statistical quality measures after bias correction. Bias correction impact on simulated historical discharge is shown in Fig. 6 (b) for CCLM-ESM. As an example, simulated discharge for CCLM-ESM with not bias corrected data leads to a misrepresentation of the discharge regime, as peak flow is shifted from August to September and discharge is highly overestimated. Moreover, poor quality measures are achieved by CCLM-ESM with not bias corrected data (Table 4).

### 3.4. Discharge change

Projected change in annual discharge for the period of 2021-2050 compared to the reference period is presented in Table 5. Alike for precipitation, a mixed annual discharge change signal is projected by the climate model ensemble. It projects: (i) more than 15 % decrease in annual discharge, which is a consequence of relative decrease in precipitation and a consistent increase in potential evapotranspiration for CCLM-ESM, CCLM-EARTH and HIRHAM-EARTH (RCP8.5); (ii) about 5 % decreased in annual discharge for the RCMs-GCMs ensemble mean under RCP8.5 which is the consequence of a slight increase in precipitation counterbalanced by a high increase in potential evapotranspiration; (iii) low to very high (3 to 50 %) increase in total discharge due to increased precipitation not counterbalanced by the evapotranspiration for CCLM-CNRM, RAMCO-EARTH, HIRHAM-NorESM, HIRHAM-EARTH (RCP4.5) and the RCMs ensemble mean (RCP4.5). The intra-annual change in discharge appears strongly determined by the precipitation change signal (Fig. 7). The divergence between climate models is reflected through a large amount of uncertainty associated with the projected annual discharge (Fig. 8).

Under RCP4.5, the discharge change signal for CCLM-ESM is more pronounced with bias corrected precipitation data compared to not bias corrected. Indeed, the projected annual discharge equals -12 % and -5 % with and without bias correction respectively (Table 5). Under RCP8.5, bias correction impact is relatively low. The Wilcoxon (1945) rank-sum, testing the significance of the difference between bias corrected and not bias corrected discharge change signal, indicates that the two signals are not different at  $p$ -level equals 0.05. A  $p$ -value of the Wilcoxon rank-sum test equals 0.51 and 0.7 is required under RCP4.5 and RCP8.5 respectively to reject the null hypothesis ( $H_0$ : discharge change with bias corrected CCLM-ESM data = discharge change with not bias corrected CCLM-ESM data). Hence, the bias correction impact on discharge change signal alteration can be considered negligible.

The sensitivity of the catchment discharge to precipitation and temperature change is tested by plotting, for each member of the climate models ensemble, predicted precipitation and temperature change against predicted discharge change. The result shows that change in total discharge cannot be strongly related to change in potential evapotranspiration (Fig. 9 a). However, a high sensitivity of river discharge to precipitation change (Fig. 9 b) is observed. Under scenario RCP4.5, an increase of +5 % in precipitation leads to an increase of discharge of about +12.5 %, whereas a decreased precipitation of the same order leads to a decrease of discharge of -13 %. The same simulations under RCP8.5 yield in a +8.3 % discharge increase and a -14.7 % discharge decrease. Interestingly,

under RCP8.5 and assuming comparable precipitation between reference and future periods, a discharge decrease of about -3.2 % should be expected (Fig. 9 b).

### 3.5. Ecohydrologic status

The Eco-hydrologic status of the catchment for the reference period and future scenarios RCP4.5 and RCP8.5 is shown in Fig. 10 to illustrate the use of energy and water by the catchment while undergoing temperature increase and precipitation change. Moving left to right along “*Excess water- $P_{ex}$* ” axis indicates that the environmental conditions in the catchment lead to an increase in discharge (CCLM-CNRM, RAMCO-EARTH and HIRHAM-NorESM). Reduction of discharge is experienced when moving the other way round (CCLM-ESM and CCLM-EARTH).

Moving upwards along “*Excess evaporative demand- $E_{ex}$* ” implies drier environmental conditions due to an increase in evaporative demand and soil water deficit. Except for HIRAM-EARTH, all the climate models project drier conditions (increase in *Excess evaporative demand*) under RCP4.5 as a result of an increased temperature not compensated by the amount and/or timing of precipitation. Increased evaporative demand, with marginally aggravated drier conditions, is shown by CCLM-ESM, HIRAM-NorESM, CCLM-EARTH and RCMs-GCMs ensemble mean under RCP8.5.

The ecohydrologic status of the catchment, irrespective of climate model and emission scenario, projects a shift for the period of 2021-2050 compared to the reference period. Therefore, differences in climate conditions between the two periods influence the hydrology (discharge, evapotranspiration, precipitation) of the catchment.

## 4. Discussion

### 4.1. Historical runs analysis

All GCMs and RCMs applied in this study have proved in previous works to fairly reproduce the climatology of West Africa (Cook and Vizzy, 2006; Dosio et al., 2015; Gbobotiyi et al., 2014; Paeth et al., 2011). The RCMs-GCMs ensemble reasonably captures the annual cycle of temperatures, and following several authors (e.g. Buontempo et al., 2014; Waongo et al., 2015) no bias correction was performed for this climate variable. The systematic positive bias and large deviation from observed precipitation exhibited by the climate models ensemble in this study is also reported by several authors (Nikulin et al., 2012; Paeth et al., 2011) for the southern Sahel Zone. This deviation motivated the bias correction of precipitation. After correction, the positive bias is significantly reduced for all individual climate models and the improvement is clearly visible.

In general, the RCMs-GCMs ensemble mean outperforms individual climate models for both temperature and precipitation. This is due to the fact that individual model errors of opposite sign cancel each other out (Nikulin et al., 2012; Paeth et al., 2011). However, the climate models ensemble mean should not be considered as an expected outcome (Nikulin et al., 2012). Rather considering a large ensemble of climate models should be seen as necessary



to properly perform future climate impact studies in the catchment (Gbobaniyi et al., 2014) and to assess the range of potential future hydrological status required for adaptation and management strategies.

#### 4.2. Climate change signal

Compared to the period of 1971-2000, a clear temperature increase signal is projected for 2021-2050 by the six members of the RCMs-GCMs ensemble in the catchment. This feature is common to all multi-model ensemble studies performed in the region (IPCC, 2014). It is further in line with the historical temperature change observed in the region as reported by Waongo (2015) who used the same observation data set applied in the current study. He reported an average +0.31°C/decade and +0.17°C/decade increase for the minimum and maximum temperature respectively for the region considering the period of 1960-2010. However, the climate models ensemble does not agree on the projected precipitation change signal as wetter (RAMCO-EARTH), drier (CCLM-ESM and CCLM-EARTH) as well as mixed (CCLM-CNRM, HIRHAM-NorESM and HIRAM-EARTH) trends are shown by the individual model. It is worth noting that the Dano catchment is located in a region where the “*Coupled Model Intercomparison Project Phase 5 (CMIP5)*” models showed divergent precipitation change for the mid-21<sup>st</sup> century (IPCC, 2014).

The precipitation change projected by CCLM-CNRM and HIRHAM-NorESM, wetter conditions associated with drought during specific months, is consistent with the change reported by Patricola and Cook (2009) for the West African region. They highlighted an increase in precipitation in general, but also noted drier June and July months. A similar result is achieved by Kunstmann et al. (2008) in the Volta Basin, albeit with a decrease in precipitation at the beginning of rainy season in April.

Precipitation change projected by CCLM-ESM and CCLM-EARTH is consistent with the decrease in June-July-August season noted by Buontempo et al. (2014). A reduction in precipitation during the rainy season is also achieved with RegCM3, driven by ECHAM5 in the Niger River Basin (Oguntunde and Abiodun, 2012). Up to 20.3 % reduction of precipitation in some months is projected, but an increased precipitation during the dry season is also expected.

A critical analysis of CCLM (by Dosio et al., 2015) showed that the model is significantly influenced by the driving GCM (including EC-Earth, ESM-LR, and CNRM-CM). Such an analysis was not found for RACMO and HIRAM. Overestimation of precipitation is a common feature to the RCMs-GCMs ensemble applied in this study, which could suggest that the RCMs inherit the bias from the GCM (Dosio et al., 2015). Consistently with Paeth et al. (2011), the relation between RCM trend and driving GCM cannot be observed in the current study as CCLM-EARTH and RACMO-EARTH clearly show opposite trends although both are driven by EC-EARTH. Differences in projected trends are also highlighted by individual RCMs driven by different GCMs (e.g. CCLM-EARTH and CCLM-CNRM).

### 4.3. Historical discharge

Compared to the observation based simulation, not bias corrected RCMs-GCMs based discharge is characterized by an overestimation of annual discharge. This misrepresentation results from the positive precipitation bias presented by the climate models ensemble. The bias correction significantly improves the ability of all members of the climate models ensemble to reproduce the historical discharge regime. By comparing simulated discharge for CCLM-ESM with bias corrected and not bias corrected precipitation data, it clearly appears that the bias correction methodology is effective with regards to both discharge regime and total discharge. However, a trend towards discharge overestimation was noticed after bias correction of precipitation. This could be related to:

- (i) the relative long period used for the bias correction (1971-2000). As noticed by Piani et al. (2010), fragmenting the correction period to decade and deriving several transfer functions can improve the bias correction result and further contribute to capture the decadal rainfall change that characterizes the West African climate; and
- (ii) the fact that temperature was not bias corrected. This led to  $ETp$  values that vary from one RCM-GCM to another since  $ETp$  after *Hamon* is computed based on temperature values only (Table 2). As a result, a relatively large range of potential evapotranspiration is observed for the climate models as an ensemble (Table 6).

In view of the general good simulation of historical discharge for the climate models ensemble, it is worth noting that running the hydrological model with simulated climate data of one node at a time (section 2.2) has reasonably bridged the discrepancy between RCMs-GCMs data resolution and hydrological modeling domain (see [fig. 1 of supplementary materials for the hydrological spread of the 20 nodes approach](#) and [fig.2 of supplementary materials for the difference in precipitation between the 20 nodes approach and the standard 3x3 nodes average approach](#)). Therefore, the approach can be considered as eligible for climate change impact assessment for small scale catchments. However, besides regional climate specificities, its reliability might depend on the extent of the RCM-domain used to simulate a given catchment climate, which in the case of this study was set at  $0.44^{\circ} \times 4$  over  $0.44^{\circ} \times 5$  in order to account for climate spatial variability.

### 4.4. Discharge change

A mixed annual discharge change signal is projected by the climate models ensemble for the period of 2021-2050. These trends agree with several studies in the region (Table 7), although all were carried out at the mesoscale and macroscale:

- **Negative trend** (CCLM-ESM and CCLM-EARTH). A discharge decrease of 30 to 46 % is reported by Ruelland et al. (2012) using MadCM3 and MPI-M in the Bani catchment. A similar trend, resulting from a combination of temperature increase and precipitation decrease was reached by Mbaye et al. (2015) using the climate model REMO in the Upper Senegal Basin; as did Cornelissen et al. (2013) and Bossa et al. (2014) in the T rou and the Ou  m   catchment respectively.

- **Positive trend** (CCLM-CNRM, RAMCO-EARTH and HIRHAM-NorESM). An increase of 38 % in annual discharge in the region is reported by Ardoin-Bardin et al. (2009) for the Sassandra catchment (South of the Dano catchment) using climate projections of HadCM3-A2. This results from a 11 % increase in precipitation not counterbalanced by the 4.5 % increase of potential evapotranspiration.
- **Mixed trend** (HIRHAM-EARTH and RCMs-GCMs ensemble). A mixed discharge change signal for the future period is the common signal projected by multi-climate models studies performed in the West African region. In the Niger basin, Aich et al. (2014) simulated change in annual discharge ranging from an increase of up to 50 % to a decrease of up to 50 % using an ensemble of five climate models. Similar signals are reported by Kasei (2009) who applied two climate models (MM5 and REMO) in the Volta basin.

This mixed hydrological change signal is the result of high uncertainties associated to the precipitation change projected by climate models for the catchment (IPCC, 2014). The Wilcoxon rank-sum test further indicated that bias correction did not significantly alter these discharge change signals. Due to the high sensitivity and nonlinear response of the catchment discharge to precipitation, any change in precipitation will have a strong impact on the discharge; the impact will further be pronounced under RCP8.5 compared to RCP4.5. Irrespective of emission scenario, change in potential evapotranspiration alone failed to strongly explain change in annual discharge (Fig. 9 a); this is partly explained by the fact that the environmental system of the catchment is water limited and not energy limited.

The water limited environment of the catchment might also explain the performance of the hydrological model for the climate models ensemble despite the non-bias correction of temperature data (up to 4°C gaps between observed and simulated temperature were noticed for some months, section 3.1). The annual evaporative demand for the climate models ensemble, including RACMO-EARTH which underestimated observed temperature for the reference period, exceeds (almost doubles) precipitation (Table 6). In such a system, also characterized by extended periods with little to no precipitation (November-May) actual evapotranspiration is strongly controlled by precipitation (Guswa, 2005; Schenk and Jackson, 2002). Therefore, an increase in  $ET_p$  is not necessarily translated in an increase in  $ET_a$  as limitation in precipitation (soil moisture) dictates water fluxes (Newman et al., 2006) (e.g. CCLM-EARTH and CCLM-ESM in Table 6).

#### 4.5. Ecohydrologic status

The  $E_{ex}-P_{ex}$  plot (Fig. 10) allows accurately displaying climate change impact on the catchment hydrology, as main water balance components (precipitation, discharge and evapotranspiration) are presented in an integrated manner.

The overall ecohydrologic effect of climate change in the catchment, as shown by the plots, is a trend towards drier environmental conditions due to increased evaporative demand- $E_{ex}$ . This denotes an increase in potential evapotranspiration higher than the increase in actual evapotranspiration. By contrast, change in the proportion of precipitation converted to discharge- $P_{ex}$  appears specific to each climate model, with a marginal trend towards discharge increase for the models ensemble under RCP4.5 and discharge decrease under RCP8.5.

The climate models ensemble mean projects a precipitation increase of about 1.5 % under RCP8.5 with a resulting discharge decrease of 2 %. This indicates that the catchment ecosystem (defined as the vegetation within the catchment and provided by the land use and land cover map of the catchment) is able to optimize the use of water and energy available in the environment, thus reducing unused water ( $P_{ex}$ ) with temperature increase (Caylor et al., 2009). Such an optimization, although not investigated in this study, may lead plants to change the allocation of fixed carbon to various tissues and organs (Collins and Bras, 2007; Milne et al., 2002). The suitability of the catchment area for the current plant species could also be affected (McClean et al., 2005) by the projected climate change.

In a previous study (Yira et al., 2016), land use in the catchment was found to be characterized by conversion from savannah to cropland implying the reduction of the vegetation covered fraction, root depth, leaf area index etc. Such a land use and land cover change strongly affects the ecohydrologic status of a catchment. Tomer and Schilling (2009) highlighted that removal of perennial vegetation leads to an increase of both *Excess Water- $P_{ex}$*  and *Excess evaporative demand- $E_{ex}$* . Combining this land use change to climate change impact would therefore on the one hand aggravate water stress for plants in the catchment and on the other hand increase the unused water in the catchment.

## 5. Conclusion

An ensemble of six RCMs-GCMs data, all produced in the frame of the CORDEX-Africa project, were used as input to a hydrological simulation model to investigate climate change impact on water resources in the Dano catchment by the mid-21<sup>st</sup> century. The ability of the RCMs-GCMs ensemble to simulate historical climate and discharge was evaluated prior to future climate change impact assessment.

The six climate models fairly reproduce the observed temperature. By contrast, bias correction was necessary for all climate models to accurately reproduce observed precipitation and historical discharge. The applied bias correction method further proved not to alter the discharge change signal. However, projected discharge change signal with and without bias corrected data were tested very comparable. This result indicates that it is safe to perform bias correction; it also points out the “non-necessity” of performing bias correction in order to detect future discharge change signal in the catchment.

A temperature increase is consistently projected by the models ensemble. This reinforces the commonly acknowledged warming signal for the region. However, the lack of agreement among models with regard to the projected precipitation change signal creates a considerable uncertainty about how the catchment discharge will evolve by 2050. As discharge in the catchment is strongly determined by precipitation, no clear trend in future development of water resources can be concluded due to the high variability of the different climate models and scenarios. Therefore, potential increase and decrease of future discharge have to be considered in climate change adaptation strategies in the region.

The ecohydrological concept as applied in this study proved to fully capture climate change impact on the catchment hydrology as both discharge change signal, precipitation and actual/potential evapotranspiration change signal are consistently displayed by the  $E_{ex}$ - $P_{ex}$  plot. The approach appears suitable to display the results of climate change impact on catchment hydrology; it further brings insights about the catchment environmental conditions, which can assist in development of climate change adaptation strategies.

The results further underline on the one hand the need for a larger ensemble of projections to properly estimate the impacts of climate change on water resources in the catchment and on the other hand the high uncertainty associated with climate projections for the West African region. Therefore, assessing future climate change impact on water resources for the region needs to be continuously updated with the improvement of climate projections.

### Acknowledgement

The authors are grateful for the financial support provided by the German Federal Ministry of Education and Research (BMBF) (Grant No. 01LG1202E) under the auspices of the West African Science Service Centre for Climate Change and Adapted Land Use (WASCAL) project. They thank Dr. J. Schulla for providing support for the application of WaSiM. Thanks go to the CORDEX project & partner institutions for making climate data available and to Dr. D. Wisser for providing a R-code for bias correction. Mr. T. Jütten and Mr. F. Op de Hipt are acknowledged for their comments on the manuscript.

### References

- Ahmed, K.F., Wang, G., Silander, J., Wilson, A.M., Allen, J.M., Horton, R., Anyah, R., 2013. Statistical downscaling and bias correction of climate model outputs for climate change impact assessment in the U.S. northeast. *Glob. Planet. Change* 100, 320–332. doi:10.1016/j.gloplacha.2012.11.003
- Aich, V., Liersch, S., Vetter, T., Huang, S., Tecklenburg, J., Hoffmann, P., Koch, H., Fournet, S., Krysanova, V., Müller, E.N., Hattermann, F.F., 2014. Comparing impacts of climate change on streamflow in four large African river basins. *Hydrol Earth Syst Sci* 18, 1305–1321. doi:10.5194/hess-18-1305-2014
- Aich, V., Liersch, S., Vetter, T., Fournet, S., Andersson, J.C.M., Calmanti, S., van Weert, F.H.A., Hattermann, F.F., Paton, E.N., 2016. Flood projections within the Niger River Basin under future land use and climate change. *Sci. Total Environ.* 562, 666–677. doi:10.1016/j.scitotenv.2016.04.021
- Ardoin-Bardin, S., Dezetter, A., Servat, E., Paturel, J.E., Mahé, G., Niel, H., Dieulin, C., 2009. Using general circulation model outputs to assess impacts of climate change on runoff for large hydrological catchments in West Africa. *Hydrol. Sci. J.* 54, 77–89. doi:10.1623/hysj.54.1.77
- Bossa, A.Y., Diekkrüger, B., Agbossou, E.K., 2014. Scenario-Based Impacts of Land Use and Climate Change on Land and Water Degradation from the Meso to Regional Scale. *Water* 6, 3152–3181. doi:10.3390/w6103152

490 Bossa, A.Y., Dieckkrüger, B., Giertz, S., Steup, G., Sintondji, L.O., Agbossou, E.K., Hiepe, C., 2012. Modeling the effects of crop patterns and management scenarios on N and P loads to surface water and groundwater in a semi-humid catchment (West Africa). *Agric. Water Manag.* 115, 20–37. doi:10.1016/j.agwat.2012.08.011

Buontempo, C., Mathison, C., Jones, R., Williams, K., Wang, C., McSweeney, C., 2014. An ensemble climate projection for Africa. *Clim. Dyn.* 44, 2097–2118. doi:10.1007/s00382-014-2286-2

495 Caylor, K.K., Scanlon, T.M., Rodriguez-Iturbe, I., 2009. Ecohydrological optimization of pattern and processes in water-limited ecosystems: A trade-off-based hypothesis. *Water Resour. Res.* 45, W08407. doi:10.1029/2008WR007230

Chen, J., Brissette, F.P., Chaumont, D., Braun, M., 2013. Performance and uncertainty evaluation of empirical downscaling methods in quantifying the climate change impacts on hydrology over two North American river basins. *J. Hydrol.* 479, 200–214. doi:10.1016/j.jhydrol.2012.11.062

500 Collins, D.B.G., Bras, R.L., 2007. Plant rooting strategies in water-limited ecosystems. *Water Resour. Res.* 43, W06407. doi:10.1029/2006WR005541

Cook, K.H., 2008. Climate science: The mysteries of Sahel droughts. *Nat. Geosci.* 1, 647–648. doi:10.1038/ngeo320

Cook, K.H., Vizy, E.K., 2006. Coupled Model Simulations of the West African Monsoon System: Twentieth- and Twenty-First-Century Simulations. *J. Clim.* 19, 3681–3703. doi:10.1175/JCLI3814.1

505 Cornelissen, T., Dieckkrüger, B., Giertz, S., 2013. A comparison of hydrological models for assessing the impact of land use and climate change on discharge in a tropical catchment. *J. Hydrol.* 498, 221–236. doi:10.1016/j.jhydrol.2013.06.016

Dosio, A., Panitz, H.-J., Schubert-Frisius, M., Lüthi, D., 2015. Dynamical downscaling of CMIP5 global circulation models over CORDEX-Africa with COSMO-CLM: evaluation over the present climate and analysis of the added value. *Clim. Dyn.* 44, 2637–2661. doi:10.1007/s00382-014-2262-x

510 Druyan, L.M., Feng, J., Cook, K.H., Xue, Y., Fulakeza, M., Hagos, S.M., Konaré, A., Moufouma-Okia, W., Rowell, D.P., Vizy, E.K., Ibrah, S.S., 2009. The WAMME regional model intercomparison study. *Clim. Dyn.* 35, 175–192. doi:10.1007/s00382-009-0676-7

Ehret, U., Zehe, E., Wulfmeyer, V., Warrach-Sagi, K., Liebert, J., 2012. HESS Opinions “Should we apply bias correction to global and regional climate model data?” *Hydrol Earth Syst Sci* 16, 3391–3404. doi:10.5194/hess-16-3391-2012

515 Feddes, R.A., Kowalik, P.J., Zaradny, H., 1978. Simulation of field water use and crop yield. Centre for Agricultural Publishing and Documentation.

Federer, C.A., Lash, D., 1983. BROOK - a hydrologic simulation model for eastern forests. Resources Research Center, University of New Hampshire.

520 Foley, A.M., 2010. Uncertainty in regional climate modelling: A review. *Prog. Phys. Geogr.* doi:10.1177/0309133310375654

Gbobaniyi, E., Sarr, A., Sylla, M.B., Diallo, I., Lennard, C., Dosio, A., Dhiédiou, A., Kamga, A., Klutse, N.A.B., Hewitson, B., Nikulin, G., Lamptey, B., 2014. Climatology, annual cycle and interannual variability of

525 precipitation and temperature in CORDEX simulations over West Africa. *Int. J. Climatol.* 34, 2241–2257.  
doi:10.1002/joc.3834

Gudmundsson, L., Bremnes, J.B., Haugen, J.E., Engen-Skaugen, T., 2012. Technical Note: Downscaling RCM  
precipitation to the station scale using statistical transformations - a comparison of methods. *Hydrol. Earth  
Syst. Sci.* 16, 3383–3390. doi:10.5194/hess-16-3383-2012

530 Gupta, H.V., Kling, H., Yilmaz, K.K., Martinez, G.F., 2009. Decomposition of the mean squared error and NSE  
performance criteria: Implications for improving hydrological modelling. *J. Hydrol.* 377, 80–91.  
doi:10.1016/j.jhydrol.2009.08.003

Guswa, A.J., 2005. Soil-moisture limits on plant uptake: An upscaled relationship for water-limited ecosystems.  
*Adv. Water Resour.* 28, 543–552. doi:10.1016/j.advwatres.2004.08.016

535 Hagemann, S., Chen, C., Haerter, J.O., Heinke, J., Gerten, D., Piani, C., 2011. Impact of a Statistical Bias Correction  
on the Projected Hydrological Changes Obtained from Three GCMs and Two Hydrology Models. *J.  
Hydrometeorol.* 12, 556–578. doi:10.1175/2011JHM1336.1

IPCC, 2014. *Climate change 2014: impacts, adaptation, and vulnerability. Part B: regional aspects. Contribution of  
Working Group II to the Fifth Assessment Report of the Intergovernmental Panel on Climate Change*  
540 (Barros, V.R., C.B. Field, D.J. Dokken, M.D. Mastrandrea, K.J. Mach, T.E. Bilir, M. Chatterjee, K.L. Ebi,  
Y.O. Estrada, R.C. Genova, B. Girma, E.S. Kissel, A.N. Levy, S. MacCracken, P.R. Mastrandrea, and L.L.  
White, Cambridge University Press, Cambridge, United Kingdom and New York, NY, USA, 688 . ed.

Johnson, F., Sharma, A., 2015. What are the impacts of bias correction on future drought projections? *J. Hydrol.*  
525, 472–485. doi:10.1016/j.jhydrol.2015.04.002

545 Kasei, R.A., 2009. Modelling impacts of climate change on water resources in the Volta Basin, West Africa. (PhD  
Thesis) University of Bonn, Germany. <http://hss.ulb.uni-bonn.de/2010/1977/1977.pdf>.

Kasei, R., Diekkrüger, B., Leemhuis, C., 2009. Drought frequency in the Volta Basin of West Africa. *Sustain. Sci.* 5,  
89–97. doi:10.1007/s11625-009-0101-5

Klein, C., Heinzeller, D., Bliefernicht, J., Kunstmann, H., 2015. Variability of West African monsoon patterns  
550 generated by a WRF multi-physics ensemble. *Clim. Dyn.* 45, 2733–2755. doi:10.1007/s00382-015-2505-5

Kling, H., Fuchs, M., Paulin, M., 2012. Runoff conditions in the upper Danube basin under an ensemble of climate  
change scenarios. *J. Hydrol.* 424–425, 264–277. doi:10.1016/j.jhydrol.2012.01.011

Kunstmann, H., Jung, G., Wagner, S., Clotey, H., 2008. Integration of atmospheric sciences and hydrology for the  
development of decision support systems in sustainable water management. *Phys. Chem. Earth Parts ABC,*  
555 *Hydrological Assessment and Integrated Water Resources Management with Special Focus on Developing  
Countries* 33, 165–174. doi:10.1016/j.pce.2007.04.010

Mbaye, M.L., Hagemann, S., Haensler, A., Stacke, T., Gaye, A.T., Afouda, A., 2015. Assessment of Climate  
Change Impact on Water Resources in the Upper Senegal Basin (West Africa). *Am. J. Clim. Change* 4, 77.  
doi:10.4236/ajcc.2015.41008



- 560 McClean, C.J., Lovett, J.C., Küper, W., Hannah, L., Sommer, J.H., Barthlott, W., Termansen, M., Smith, G.F., Tokumine, S., Taplin, J.R.D., 2005. African Plant Diversity and Climate Change. *Ann. Mo. Bot. Gard.* 92, 139–152.
- Milne, B.T., Gupta, V.K., Restrepo, C., 2002. A scale invariant coupling of plants, water, energy, and terrain. *Écoscience* 9, 191–199.
- 565 Moss, R.H., Edmonds, J.A., Hibbard, K.A., Manning, M.R., Rose, S.K., van Vuuren, D.P., Carter, T.R., Emori, S., Kainuma, M., Kram, T., Meehl, G.A., Mitchell, J.F.B., Nakicenovic, N., Riahi, K., Smith, S.J., Stouffer, R.J., Thomson, A.M., Weyant, J.P., Wilbanks, T.J., 2010. The next generation of scenarios for climate change research and assessment. *Nature* 463, 747–756. doi:10.1038/nature08823
- Muerth, M.J., Gauvin St-Denis, B., Ricard, S., Velázquez, J.A., Schmid, J., Minville, M., Caya, D., Chaumont, D., 570 Ludwig, R., Turcotte, R., 2013. On the need for bias correction in regional climate scenarios to assess climate change impacts on river runoff. *Hydrol Earth Syst Sci* 17, 1189–1204. doi:10.5194/hess-17-1189-2013
- Nash, J.E., Sutcliffe, J.V., 1970. River flow forecasting through conceptual models part I — A discussion of principles. *J. Hydrol.* 10, 282–290. doi:10.1016/0022-1694(70)90255-6
- 575 Newman, B.D., Wilcox, B.P., Archer, S.R., Breshears, D.D., Dahm, C.N., Duffy, C.J., McDowell, N.G., Phillips, F.M., Scanlon, B.R., Vivoni, E.R., 2006. Ecohydrology of water-limited environments: A scientific vision. *Water Resour. Res.* 42, W06302. doi:10.1029/2005WR004141
- Nikulin, G., Jones, C., Giorgi, F., Asrar, G., Büchner, M., Cerezo-Mota, R., Christensen, O.B., Déqué, M., Fernandez, J., Hänsler, A., van Meijgaard, E., Samuelsson, P., Sylla, M.B., Sushama, L., 2012. 580 Precipitation Climatology in an Ensemble of CORDEX-Africa Regional Climate Simulations. *J. Clim.* 25, 6057–6078. doi:10.1175/JCLI-D-11-00375.1
- Oguntunde, P.G., Abiodun, B.J., 2012. The impact of climate change on the Niger River Basin hydroclimatology, West Africa. *Clim. Dyn.* 40, 81–94. doi:10.1007/s00382-012-1498-6
- Oyerinde, G.T., Hountondji, F.C.C., Wisser, D., Diekkrüger, B., Lawin, A.E., Odofin, A.J., Afouda, A., 2014. 585 Hydro-climatic changes in the Niger basin and consistency of local perceptions. *Reg. Environ. Change* 15, 1627–1637. doi:10.1007/s10113-014-0716-7
- Paeth, H., Hall, N.M.J., Gaertner, M.A., Alonso, M.D., Moumouni, S., Polcher, J., Ruti, P.M., Fink, A.H., Gosset, M., Lebel, T., Gaye, A.T., Rowell, D.P., Moufouma-Okia, W., Jacob, D., Rockel, B., Giorgi, F., Rummukainen, M., 2011. Progress in regional downscaling of west African precipitation. *Atmospheric Sci. Lett.* 12, 75–82. doi:10.1002/asl.306
- 590 Patricola, C.M., Cook, K.H., 2009. Northern African climate at the end of the twenty-first century: an integrated application of regional and global climate models. *Clim. Dyn.* 35, 193–212. doi:10.1007/s00382-009-0623-7
- Piani, C., Weedon, G.P., Best, M., Gomes, S.M., Viterbo, P., Hagemann, S., Haerter, J.O., 2010. Statistical bias 595 correction of global simulated daily precipitation and temperature for the application of hydrological models. *J. Hydrol.* 395, 199–215. doi:10.1016/j.jhydrol.2010.10.024

Roudier, P., Ducharne, A., Feyen, L., 2014. [Climate change impacts on runoff in West Africa: a review. Hydrol Earth Syst Sci 18, 2789–2801. doi:10.5194/hess-18-2789-2014](#)

Ruelland, D., Ardoin-Bardin, S., Collet, L., Roucou, P., 2012. Simulating future trends in hydrological regime of a large Sudano-Sahelian catchment under climate change. J. Hydrol. 424–425, 207–216. doi:10.1016/j.jhydrol.2012.01.002

Ruti, P.M., Williams, J.E., Hourdin, F., Guichard, F., Boone, A., Van Velthoven, P., Favot, F., Musat, I., Rummukainen, M., Domínguez, M., Gaertner, M.Á., Lafore, J.P., Losada, T., Rodríguez de Fonseca, M.B., Polcher, J., Giorgi, F., Xue, Y., Bouarar, I., Law, K., Josse, B., Barret, B., Yang, X., Mari, C., Traore, A.K., 2011. The West African climate system: a review of the AMMA model inter-comparison initiatives. Atmospheric Sci. Lett. 12, 116–122. doi:10.1002/asl.305

Salack, S., Sarr, B., Sangare, S.K., Ly, M., Sanda, I.S., Kunstmann, H., 2015. Crop-climate ensemble scenarios to improve risk assessment and resilience in the semi-arid regions of West Africa. Clim. Res. 65, 107–121. doi:10.3354/cr01282

Schenk, H.J., Jackson, R.B., 2002. Rooting depths, lateral root spreads and below-ground/above-ground allometries of plants in water-limited ecosystems. J. Ecol. 90, 480–494. doi:10.1046/j.1365-2745.2002.00682.x

Schmengler, A.C., 2011. Modeling Soil Erosion and Reservoir Sedimentation at Hillslope and Catchment Scale in Semi-Arid Burkina Faso (PhD Thesis). University of Bonn, Germany.

Schulla, J., 2015. Model Description WaSiM. [http://wasim.ch/downloads/doku/wasim/wasim\\_2015\\_en.pdf](http://wasim.ch/downloads/doku/wasim/wasim_2015_en.pdf).

Sylla, M.B., Elguindi, N., Giorgi, F., Wisser, D., 2015. Projected robust shift of climate zones over West Africa in response to anthropogenic climate change for the late 21st century. Clim. Change 134, 241–253. doi:10.1007/s10584-015-1522-z

Teutschbein, C., Seibert, J., 2012. Bias correction of regional climate model simulations for hydrological climate-change impact studies: Review and evaluation of different methods. J. Hydrol. 456–457, 12–29. doi:10.1016/j.jhydrol.2012.05.052

Tomer, M.D., Schilling, K.E., 2009. A simple approach to distinguish land-use and climate-change effects on watershed hydrology. J. Hydrol. 376, 24–33. doi:10.1016/j.jhydrol.2009.07.029

van Genuchten, M.T., 1980. A Closed-form Equation for Predicting the Hydraulic Conductivity of Unsaturated Soils. Soil Sci. Soc. Am. J. 44, 892. doi:10.2136/sssaj1980.03615995004400050002x

[Waongo, M., Laux, P., Kunstmann, H., 2015. Adaptation to climate change: The impacts of optimized planting dates on attainable maize yields under rainfed conditions in Burkina Faso. Agric. For. Meteorol. 205, 23–39. doi:10.1016/j.agrformet.2015.02.006](#)

Waongo, M., 2015. Optimizing Planting Dates for Agricultural Decision-Making under Climate Change over Burkina Faso/West Africa (PhD Thesis). Augsburg, Germany. <https://opus.bibliothek.uni-augsburg.de/opus4/frontdoor/index/index/docId/3280>

Wilcoxon, F., 1945. Individual Comparisons by Ranking Methods. Biom. Bull. 1, 80–83. doi:10.2307/3001968

WRB, I.U.S.S.W.G., 2006. World reference base for soil resources, World Soil Resources Reports No. 103. ed. Food & Agriculture Org., Rom.

- 635 Yira, Y., Diekkrüger, B., Steup, G., Bossa, A.Y., 2016. Modeling land use change impacts on water resources in a tropical West African catchment (Dano, Burkina Faso). *J. Hydrol.* doi:10.1016/j.jhydrol.2016.03.052
- Zhang, H., Huang, G.H., Wang, D., Zhang, X., 2011. Uncertainty assessment of climate change impacts on the hydrology of small prairie wetlands. *J. Hydrol.* 396, 94–103. doi:10.1016/j.jhydrol.2010.10.037

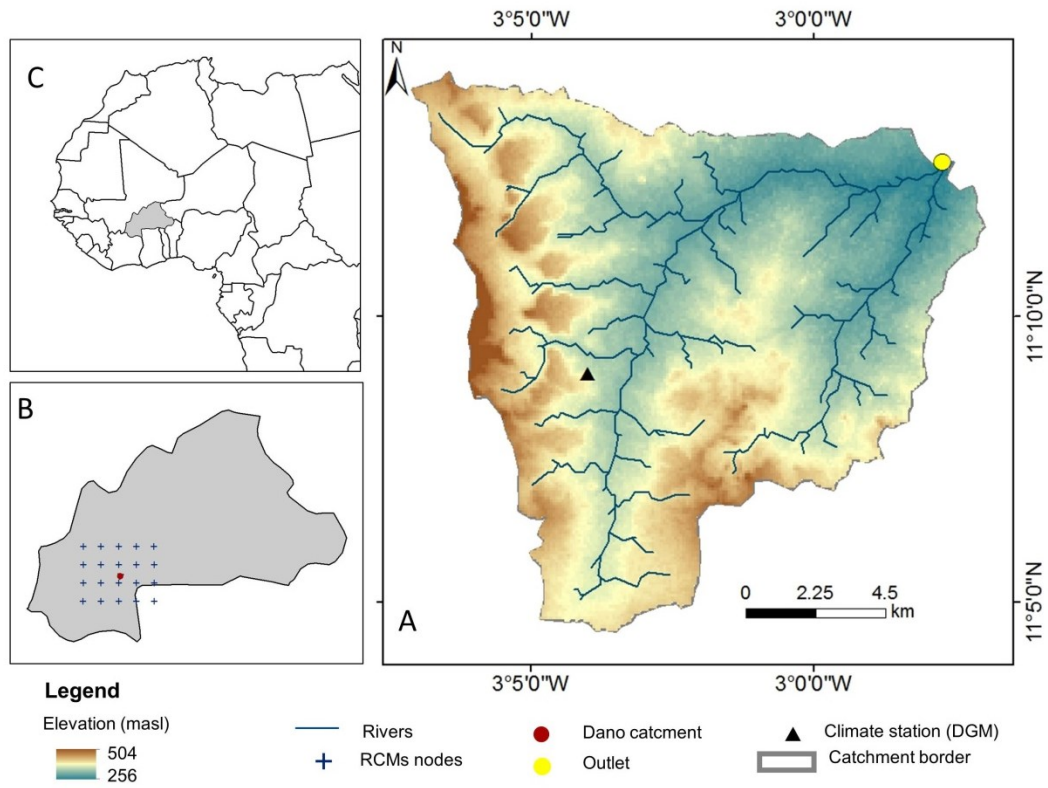

**Fig. 1** Location map: (A) Dano catchment, (B) its location in Burkina Faso and (C) in West Africa. (B) RCMs domain used in the study. [The topography and land use and land cover map of the RCMs domain are provided as supplementary materials Fig 3 and 4 respectively.](#)

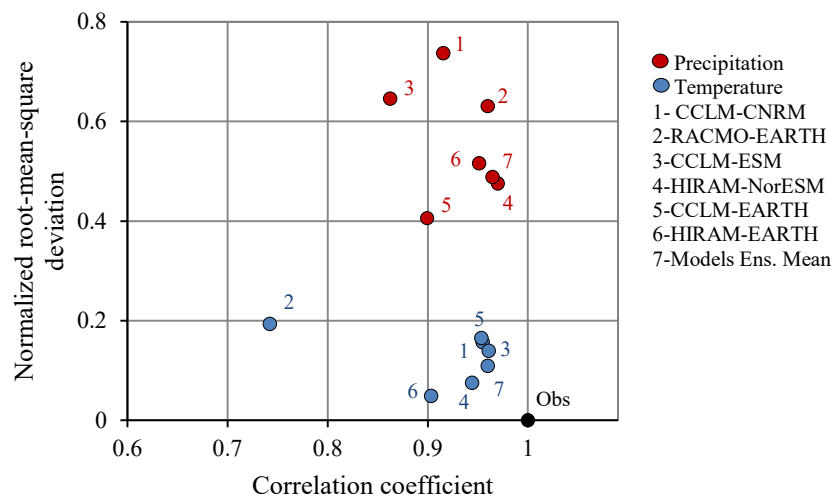

**Fig. 2** Statistics of RCM-GCM based precipitation and temperature compared to observations (Obs) for the reference period (1971-2000). Climate model data are not bias corrected. Statistics are computed based on average monthly values.

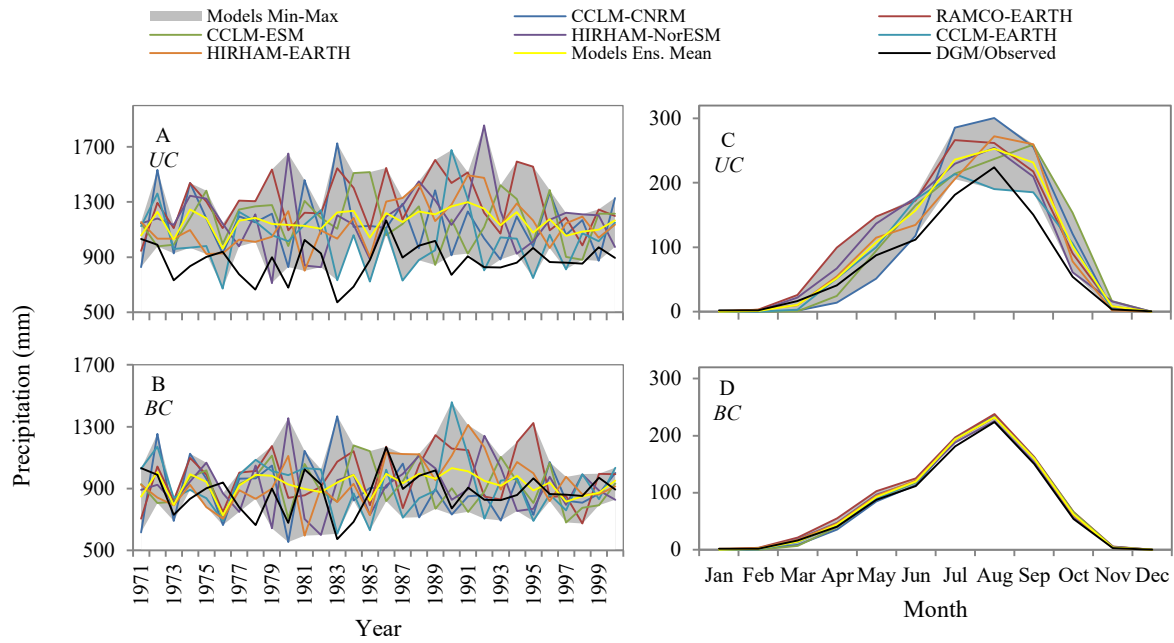

**Fig. 3** Historical mean annual (A & B) and mean monthly (C & D) precipitation. UC refers to not bias correct, BC is bias corrected.  $P$ -factor equals 50, 80, 50 and 50% for A, B, C and D respectively.  $R$ -factor equals 4.3, 3.2, 0.6 and 0.11 for A, B, C and D respectively.

650

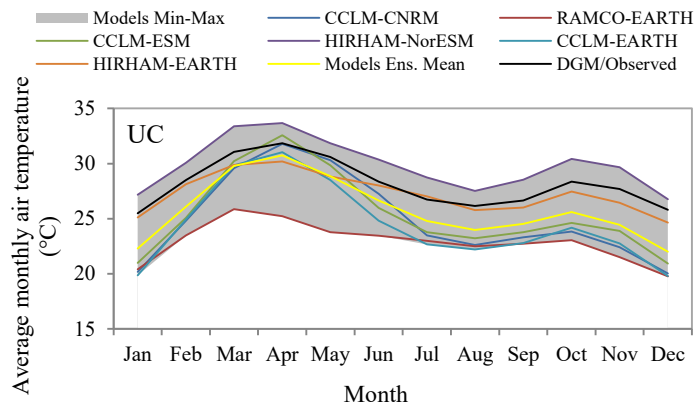

**Fig. 4** Monthly air temperature derived from climate models and observations for the reference period (1971-2000). Data are not bias corrected.  $P$ -factor= 100% and  $R$ -factor= 8.2.



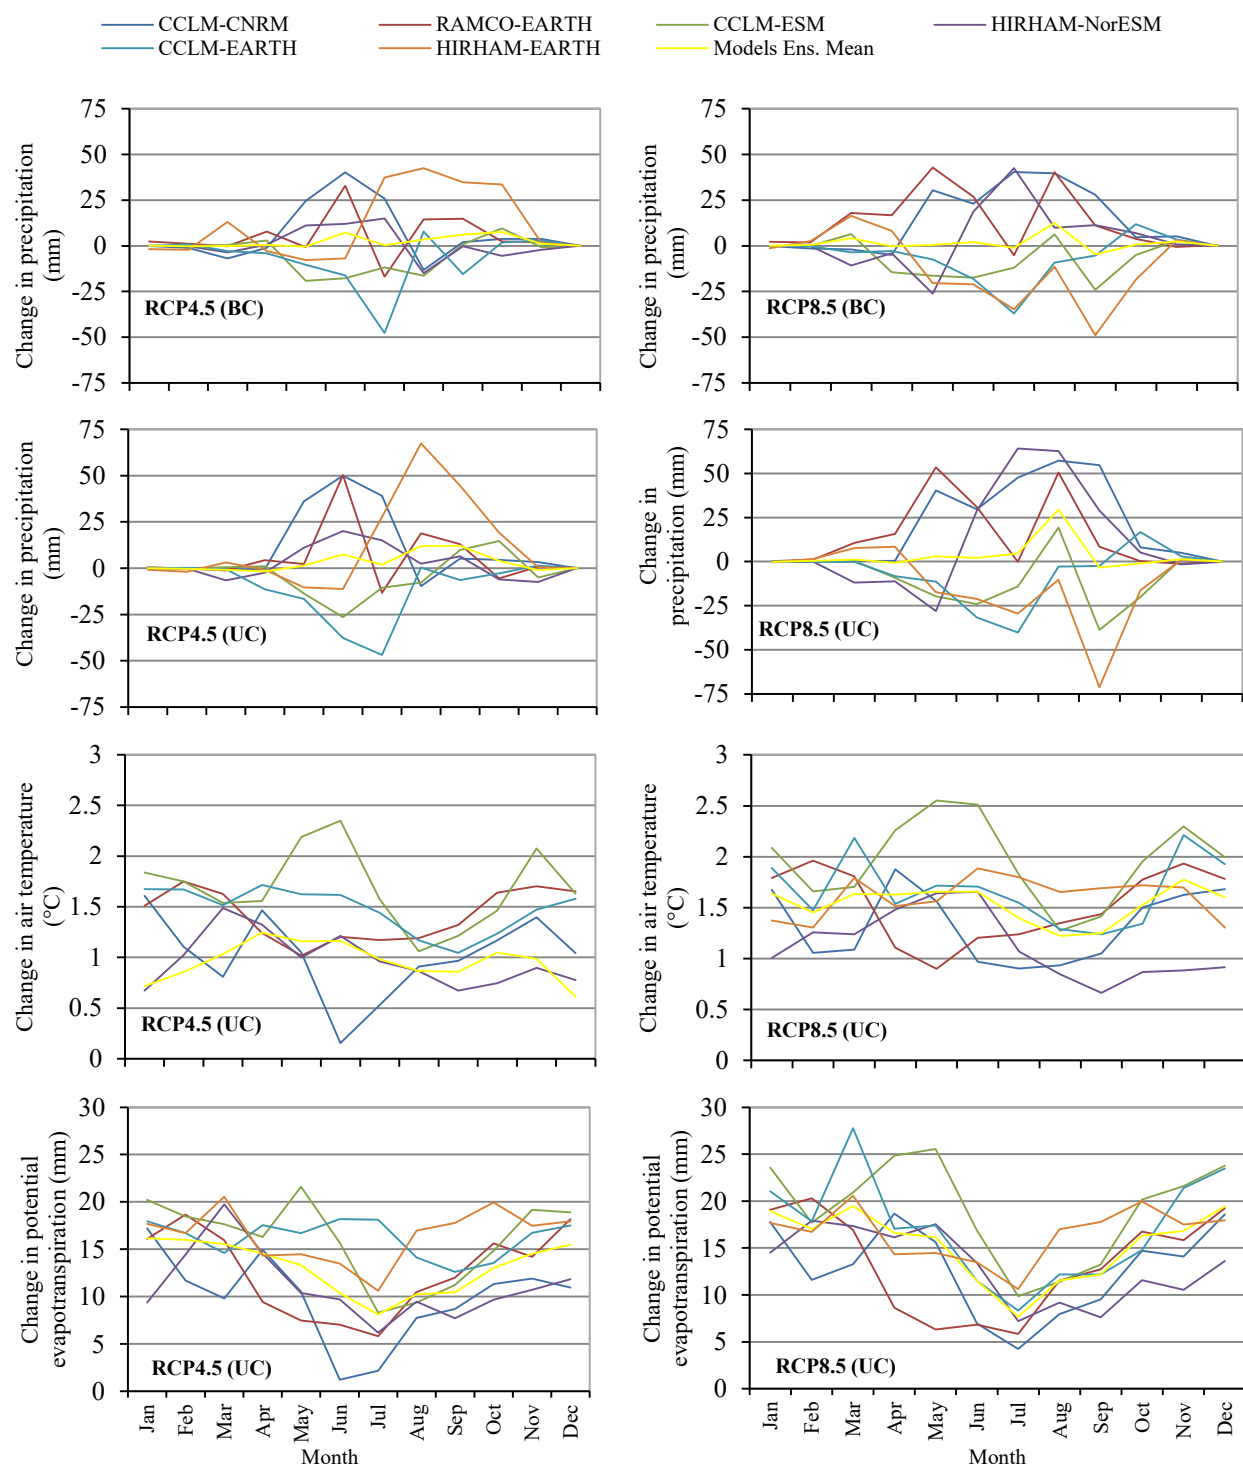

**Fig. 5** Climate change signal of precipitation, air temperature and evapotranspiration between the reference (1971-2000) and the future (2021-20150) periods under emission scenarios RCP4.5 and RCP8.5. BC is bias corrected and UC refers to not bias corrected.

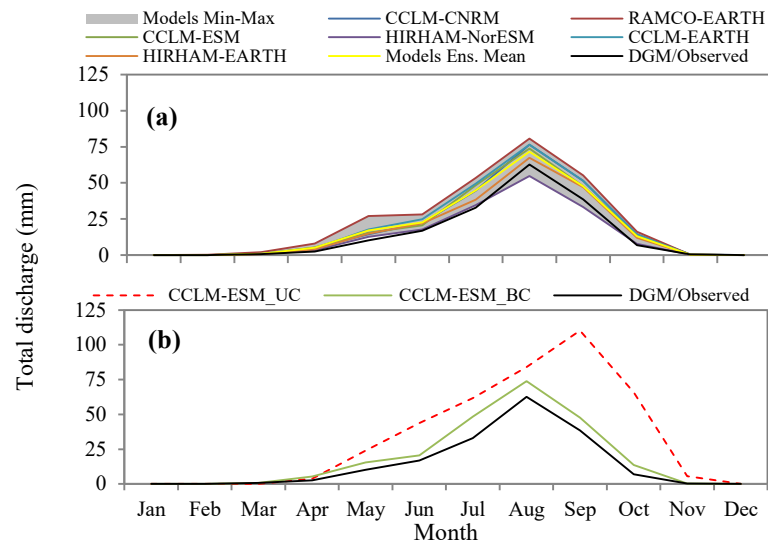

**Fig. 6** Historical RCMs-GCMs based discharge simulations and observation based discharge: (a) all RCM rainfall are bias corrected, (b) simulated discharge with bias corrected and not bias corrected rainfall data are compared for CCLM-ESM.

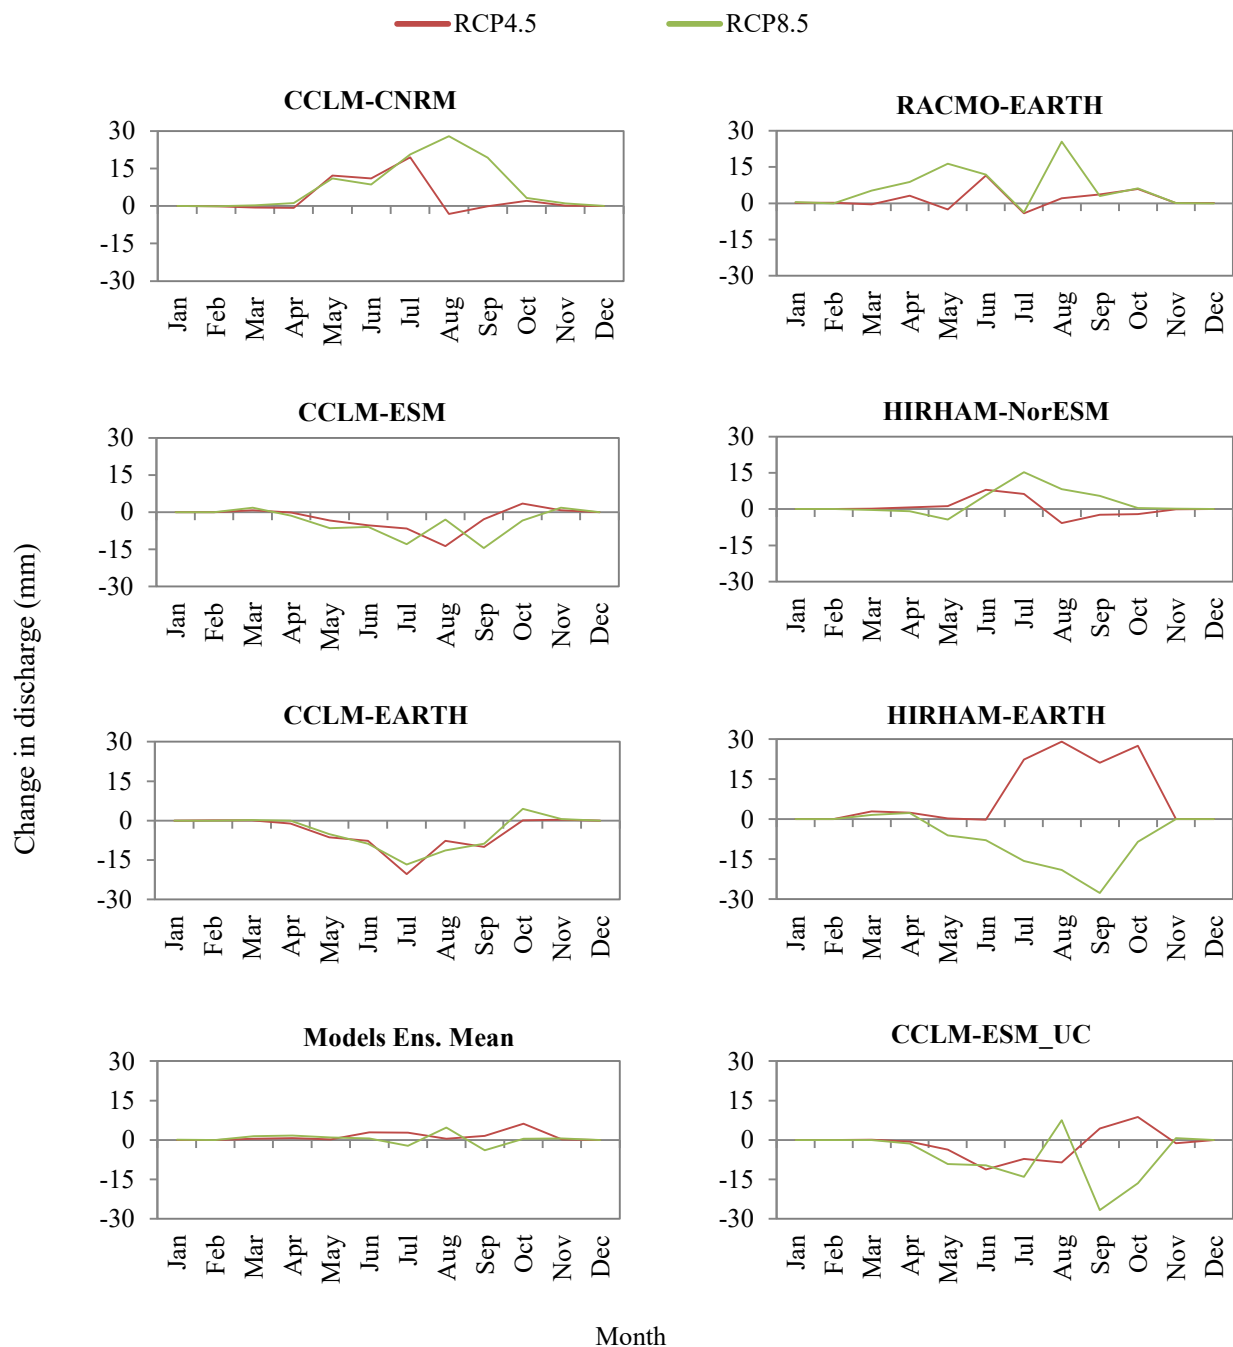

**Fig. 7** Monthly discharge change between the reference period (1971-2000) and the future period (2021-20150) under emission scenarios RCP4.5 and RCP8.5. UC refers to not bias corrected.

665

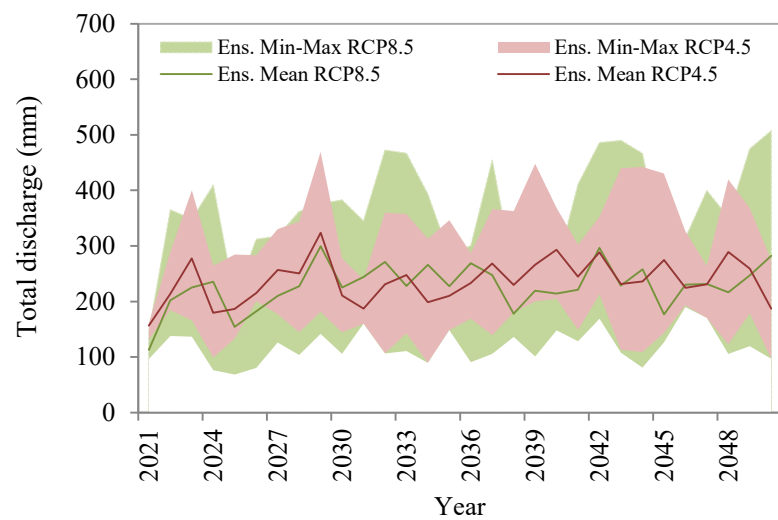

**Fig. 8** Projected annual discharge for the climate models ensemble. Simulations are performed with bias corrected precipitation data.

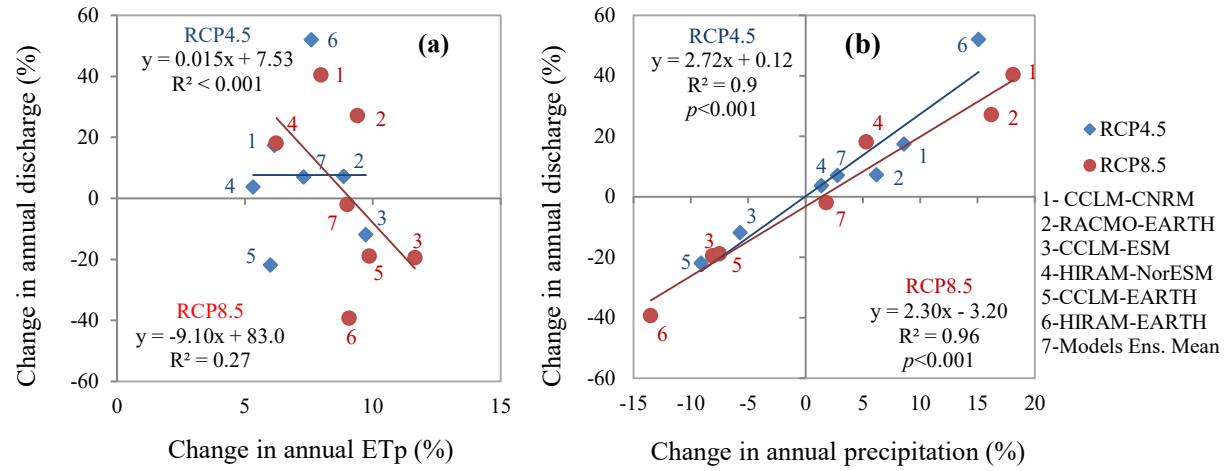

**Fig. 9** Change in the annual discharge as a response to potential evapotranspiration (a) and precipitation (b) change under emission scenarios RCP4.5 and RCP8.5. Projected precipitation, potential evapotranspiration and discharge changes are calculated comparing period 1971-2000 to period 2021-2050.

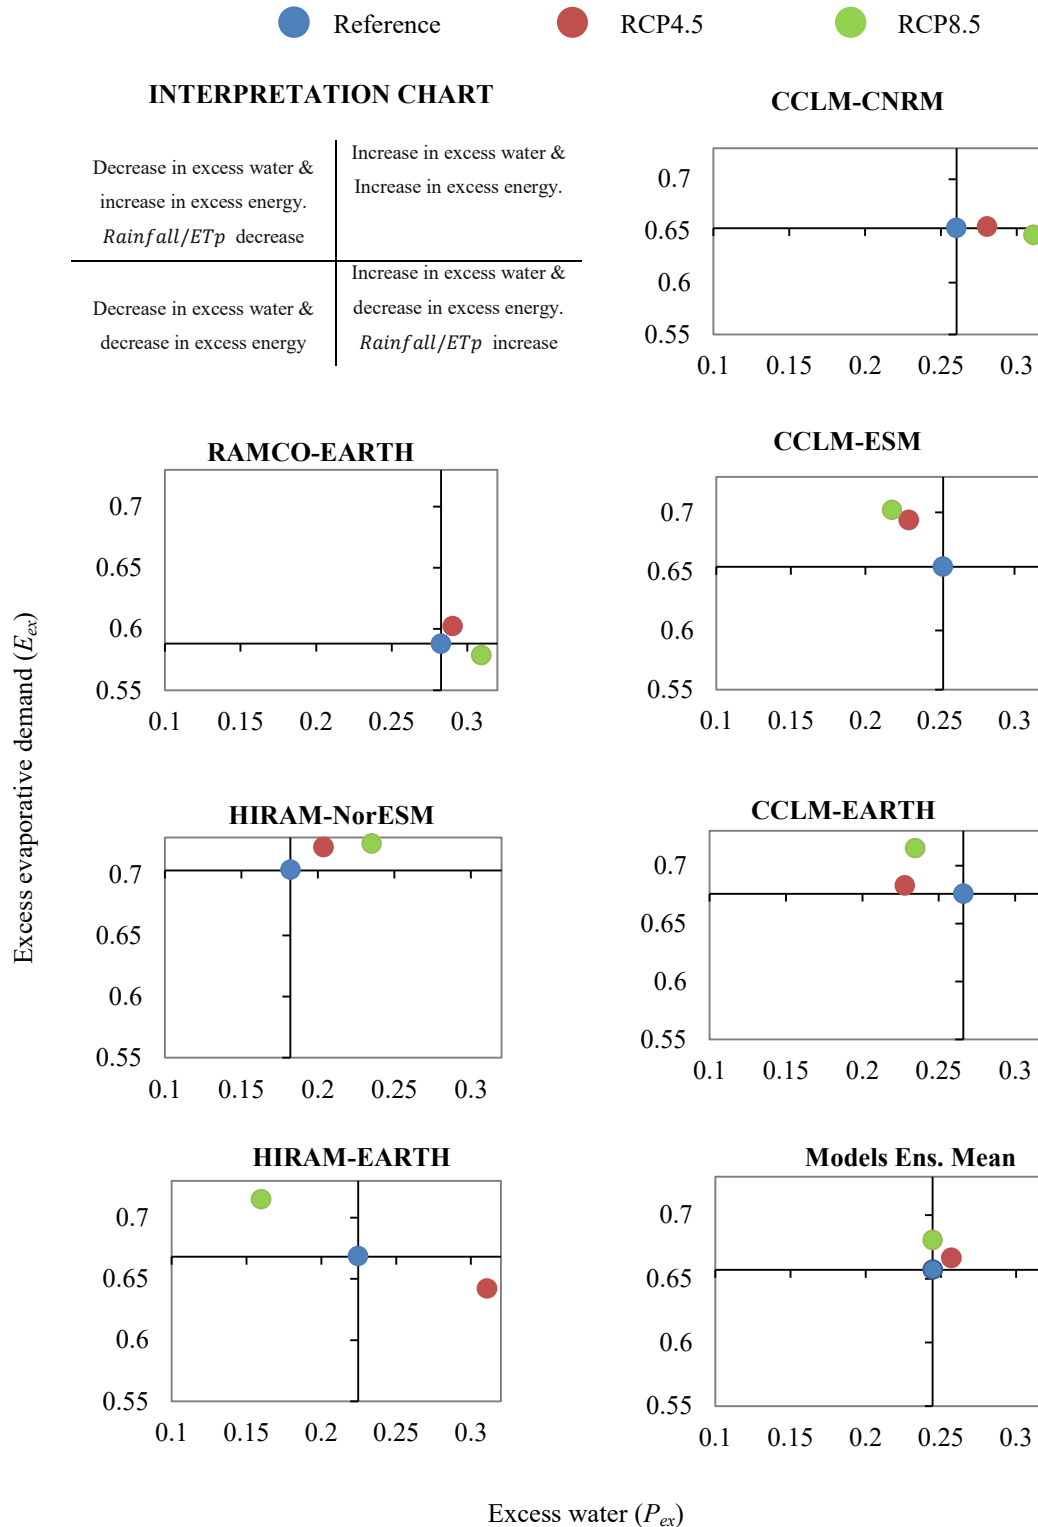

675 **Fig. 10** Plot of excess precipitation ( $P_{ex}$ ) versus evaporative demand ( $E_{ex}$ ) for the reference period (1979-2000) and the emission scenarios RCP4.5 and RCP8.5 (2021-2050) for the RCMs-GCMs ensemble. The shift of RCP dots compared to the reference period's dot indicates the effects of climate change on the catchment hydrology.  $P_{ex}$  and  $E_{ex}$  for each period are calculated from the annual average rainfall, potential evapotranspiration and actual evapotranspiration.

**Table 1** RCM-GCM products and corresponding label used in the study

| RCM     | Driving GCM | RCM Centre/Institute | Label used in the study |
|---------|-------------|----------------------|-------------------------|
| CCLM48  | CNRM-CM5    | CCLMcom              | CCLM-CNRM               |
| CCLM48  | EC-EARTH    | CCLMcom              | CCLM-EARTH              |
| CCLM48  | ESM-LR      | CCLMcom              | CCLM-ESM                |
| HIRHAM5 | NorESM1-M   | DMI                  | HIRHAM-NorESM           |
| HIRHAM5 | EC-EARTH    | DMI                  | HIRHAM-EARTH            |
| RACMO22 | EC-EARTH    | KNMI                 | RAMCO-EARTH             |

680



**Table 2** Selected sub models and algorithms of WaSiM.

| Sub model                      | Algorithm                                                                                                    |
|--------------------------------|--------------------------------------------------------------------------------------------------------------|
| Potential evapotranspiration   | Hamon (based on Federer and Lash, 1983)                                                                      |
| Actual evapotranspiration (ET) | Suction depended reduction according to Feddes et al. (1978)                                                 |
| Interception                   | Leaf area index dependent (bucket approach )                                                                 |
| Infiltration                   | Based on saturated hydraulic conductivity, soil water content and rainfall (Schulla, 2015)                   |
| Unsaturated soil zone          | Richard's equation parameterized based on van Genuchten (1980) parameterization of the water retention curve |
| Discharge routing              | Kinematic-wave using Manning-Strickler equation                                                              |

**Table 3** Projected rainfall change between reference (1971-2000) and future (2021-2050) period with bias corrected and not bias corrected RCM-GCM based simulations.

| RCM-GCM                 | Not bias corrected          |                                |                                | Bias corrected              |                                |                                |
|-------------------------|-----------------------------|--------------------------------|--------------------------------|-----------------------------|--------------------------------|--------------------------------|
|                         | Historical<br>Precipitation | Precipitation<br>change RCP4.5 | Precipitation<br>change RCP8.5 | Historical<br>precipitation | Precipitation<br>change RCP4.5 | Precipitation<br>change RCP8.5 |
|                         | (mm)                        | (%)                            | (%)                            | (mm)                        | (%)                            | (%)                            |
| <b>CCLM-CNRM</b>        | 1150.4                      | +11.0                          | +21.2                          | 900.3                       | +8.6                           | +18.1                          |
| <b>CCLM-EARTH</b>       | 1027.5                      | -11.7                          | -7.5                           | 917.7                       | -9.1                           | -7.5                           |
| <b>CCLM-ESM</b>         | 1165.2                      | -3.2                           | -9.0                           | 911.4                       | -5.7                           | -8.1                           |
| <b>HIRHAM-NorESM</b>    | 1173.3                      | +2.8                           | +11.7                          | 911.6                       | +1.4                           | +5.3                           |
| <b>HIRHAM-EARTH</b>     | 1135.0                      | +12.1                          | -13.0                          | 933.5                       | +15.1                          | -13.5                          |
| <b>RAMCO-EARTH</b>      | 1292.2                      | +5.4                           | +13.2                          | 977.9                       | +6.2                           | +16.2                          |
| <b>Models Ens. Mean</b> | 1157.3                      | +3.0                           | +3.2                           | 925.4                       | +2.8                           | +1.8                           |

685

**Table 4** Performance of RCMs-GCMs based discharge compared to observation based discharge. Performance is calculated using mean monthly discharges for the period 1971-2000.

| Climate model    | R <sup>2</sup> | NSE   | KGE   |
|------------------|----------------|-------|-------|
| CCLM-CNRM        | 0.99           | 0.92  | 0.65  |
| CCLM-EARTH       | 0.97           | 0.89  | 0.59  |
| CCLM-ESM         | 0.97           | 0.92  | 0.68  |
| CCLM-ESM_UC*     | 0.51           | -0.51 | -0.36 |
| HIRHAM-NorESM    | 0.98           | 0.99  | 0.92  |
| HIRHAM-EARTH     | 0.98           | 0.97  | 0.78  |
| RAMCO-EARTH      | 0.94           | 0.78  | 0.40  |
| Models Ens. Mean | 0.98           | 0.94  | 0.69  |

\* Simulation performed with not bias corrected rainfall data.

690 **Table 5** Mean annual discharge change projected by the RCMs-GCMs ensemble for the period 2021-2050 compared to the reference period 1971-2000.

| Climate model           | Reference discharge | Discharge change RCP4.5 | Discharge change RCP8.5 |
|-------------------------|---------------------|-------------------------|-------------------------|
|                         | (mm)                | (%)                     | (%)                     |
| <b>CCLM-CNRM</b>        | 230.6               | +17.4                   | +40.4                   |
| <b>CCLM-EARTH</b>       | 240.1               | -21.9                   | -18.9                   |
| <b>CCLM-ESM</b>         | 226.0               | -11.9                   | -19.5                   |
| <b>CCLM-ESM_UC*</b>     | 407.1               | -4.7                    | -17.0                   |
| <b>HIRHAM-NorESM</b>    | 194.9               | +3.7                    | +18.1                   |
| <b>HIRHAM-EARTH</b>     | 206.6               | +52.0                   | -39.3                   |
| <b>RAMCO-EARTH</b>      | 271.4               | +7.2                    | +27.1                   |
| <b>Models Ens. Mean</b> | 223.3               | +7.0                    | -2.0                    |

\* Simulation performed with not bias corrected rainfall data.

**Table 6** Mean annual water balance components per RCM-GCM for the historical (1971-2000) and projected (2021-2050) periods. Precipitation data are bias corrected.

|                            | CCLM-CNRM  |        |        | CCLM-EARTH |        |        | CCLM-ESM   |        |        | HIRAM-NorESM |        |        | HIRAM-EARTH |        |        | RACMO-EARTH |        |        | OBSERVED   |
|----------------------------|------------|--------|--------|------------|--------|--------|------------|--------|--------|--------------|--------|--------|-------------|--------|--------|-------------|--------|--------|------------|
| Water balance components   | Historical | RCP4.5 | RCP8.5 | Historical | RCP4.5 | RCP8.5 | Historical | RCP4.5 | RCP8.5 | Historical   | RCP4.5 | RCP8.5 | Historical  | RCP4.5 | RCP8.5 | Historical  | RCP4.5 | RCP8.5 | Historical |
| Precipitation (mm/y)       | 900        | 978    | 1063   | 917        | 834.2  | 849    | 911        | 859    | 837    | 912          | 924    | 960    | 934         | 1074   | 807    | 978         | 1038   | 1136   | 898        |
| Potential <i>ET</i> (mm/y) | 1992       | 2110   | 2145   | 1918       | 2112   | 2132   | 1979       | 2170   | 2208   | 2216         | 2349   | 2372   | 2053        | 2251   | 2253   | 1703        | 1853   | 1863   | 2070       |
| Actual <i>ET</i> (mm/y)    | 666        | 704    | 732    | 673        | 644    | 650    | 682        | 663    | 655    | 746          | 753    | 765    | 724         | 741    | 678    | 701         | 737    | 785    | 703        |
| Total discharge (mm/y)     | 231        | 270    | 324    | 240        | 187    | 195    | 226        | 199    | 182    | 194          | 201    | 229    | 207         | 314    | 126    | 271         | 291    | 345    | 198        |
| Surface runoff (mm/y)      | 103        | 141    | 170.0  | 111        | 78     | 83     | 100        | 90     | 76     | 80           | 84     | 104    | 88          | 174    | 47     | 135         | 153    | 195    | 92.9       |
| Interflow (mm/y)           | 116        | 118    | 142    | 117        | 98     | 101.4  | 114.4      | 98.7   | 95.2   | 104          | 76.9   | 81.1   | 107         | 128    | 69     | 123         | 125    | 135    | 98.0       |
| Baseflow (mm/y)            | 11.0       | 11.0   | 11.1   | 11.5       | 10.4   | 10.4   | 10.8       | 9.9    | 9.9    | 10.3         | 9.9    | 9.5    | 10.8        | 10.7   | 9.6    | 12.6        | 12.5   | 14.2   | 8.9        |

| Study                              | Location/seize                                                      | GCM/RCM                                                           | Scenario          | Reference period        | Future period           | Precipitation change (%) | Discharge change (%) |
|------------------------------------|---------------------------------------------------------------------|-------------------------------------------------------------------|-------------------|-------------------------|-------------------------|--------------------------|----------------------|
| <b>Ruelland et al. (2012)</b>      | Bani catchment, Mali/100 000Km <sup>2</sup>                         | MadCM3 and MPI-M                                                  | A2                | 1961-1990               | 2041-2070               | -2 to -10                | -30 to -46           |
| <b>Mbaye et al. (2015)</b>         | Upper Senegal Basin, Senegal-Mali-Mauritania/218000 Km <sup>2</sup> | REMO-MPI-ESM-LR                                                   | RCP4.5 and RCP8.5 | 1971-2000               | 2071-2100               | negative trend           | up to -80            |
| <b>Aich et al. (2014)</b>          | Niger Basin/ 2156000 Km <sup>2</sup>                                | HadGEM2-ES, IPSL-5 CM5A-LR, MIROC-ESM-CHEM, GFDL-ESM2M, NorESM1-M | RCP8.5            | 1970-1999               | 2070-2099               | mixed trend              | -50 to +50           |
| <b>Ardoïn-Bardin et al. (2009)</b> | Sassandra, Ivory Coast/ 62173 Km <sup>2</sup>                       | HadCM3-A2                                                         | -                 | 1971-1995               | 2036-2065               | 11.4                     | 38                   |
| <b>Bossa et al. (2014)</b>         | Ouémé catchment, Benin/ 49256 Km <sup>2</sup>                       | REMO-ECHAM5/MPI-OM                                                | A1B               | 2000-2009               | 2010-2029               | -10                      | -18                  |
| <b>Cornelissen et al. (2013)</b>   | Térou Catchment, Benin/2344 km <sup>2</sup>                         | REMO-ECHAM5/MPI-OM                                                | B1                | 2001-2010               | 2031-2049               | -11                      | -11                  |
| <b>Kasei (2009)</b>                | Volta Basin/400000 km <sup>2</sup>                                  | MM5 and REMO                                                      | B1                | 1991-2000 and 1961-2000 | 2030-2039 and 2001-2050 | +12 and -6               | +40 and -5           |

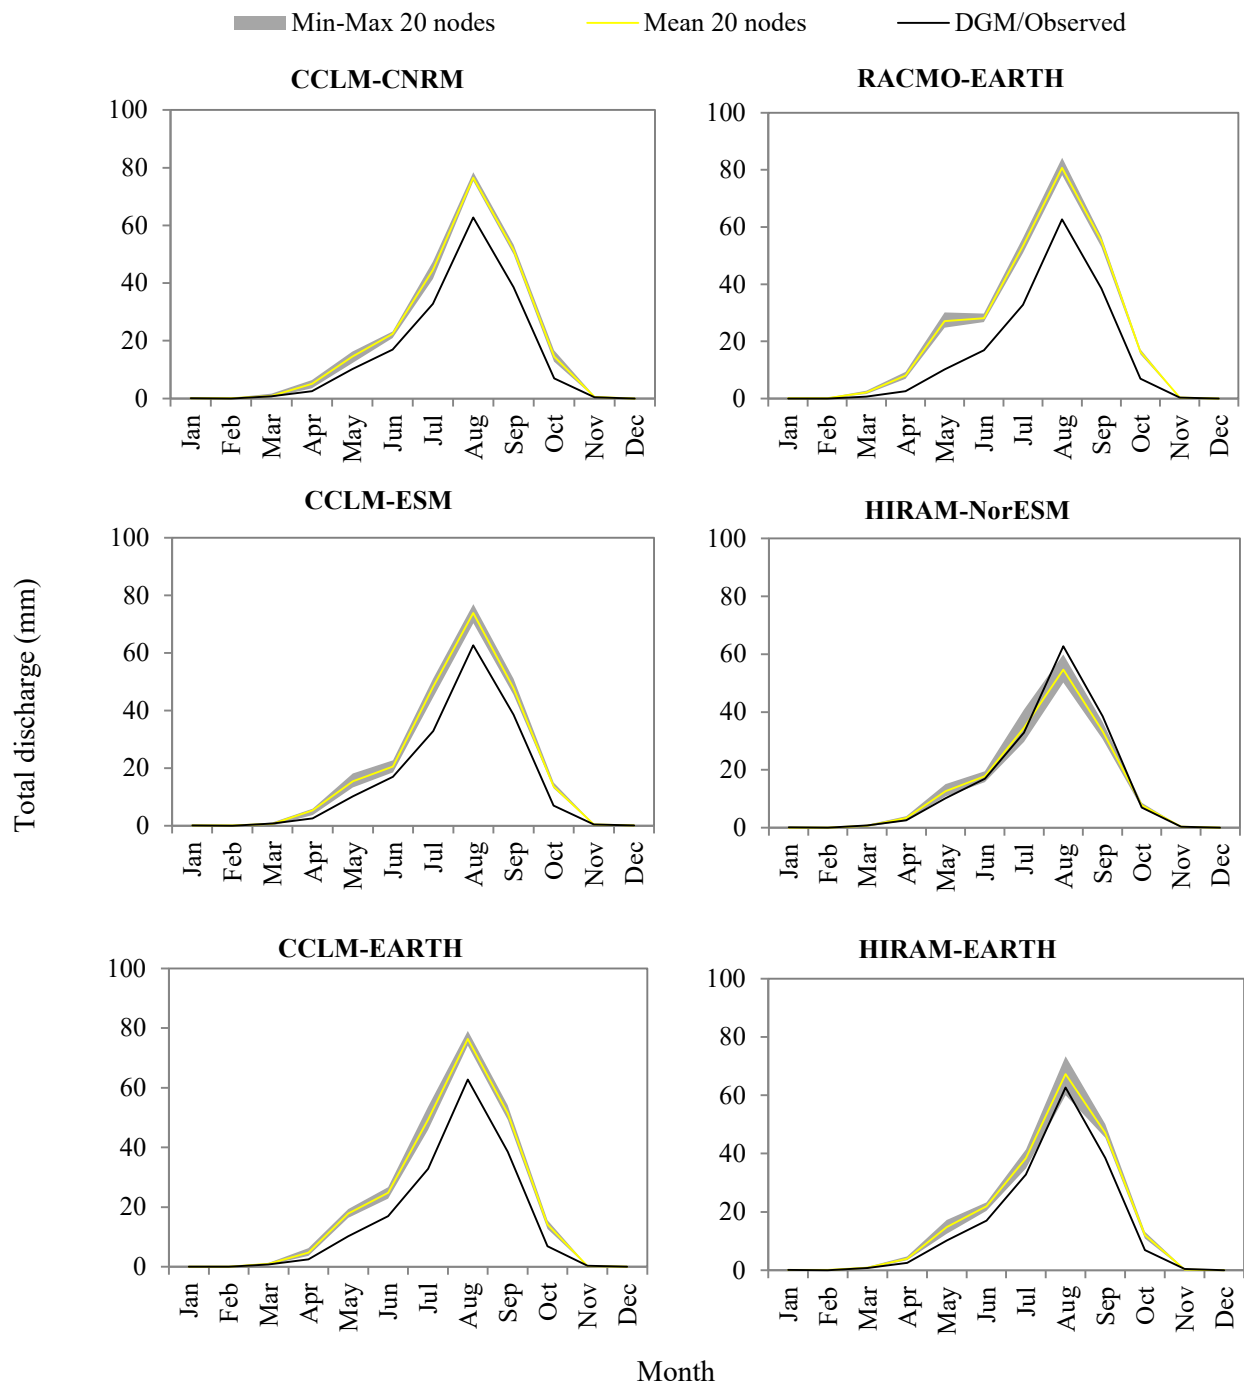

Supp\_Fig. 1 Simulated RCMs-GCMs based discharge using the 20 nodes approach as applied in the study. Simulation period is 1971-2000 and precipitation was bias corrected.

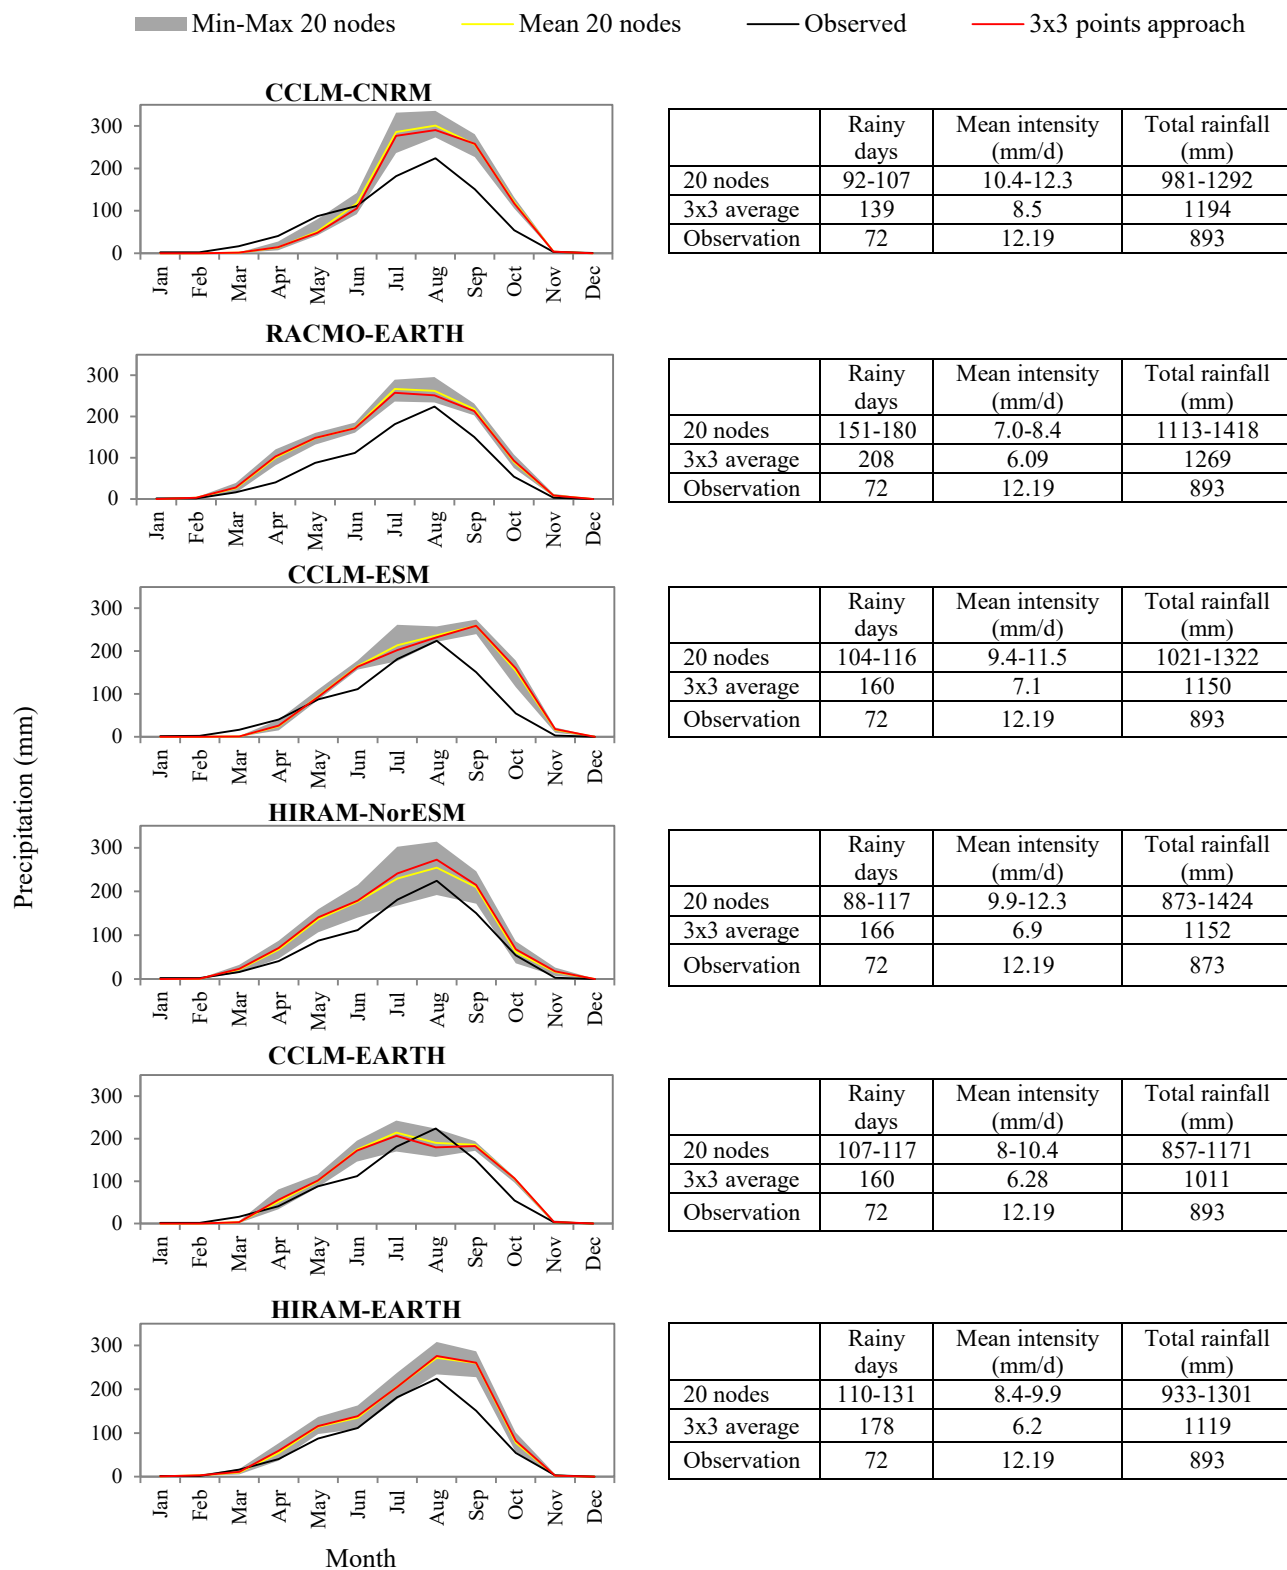

Supp\_Fig. 2 Comparison between precipitations retrieved from RCMs-GCMs using the 20 nodes approach and the standard 3x3 average approach. The comparison period is 1971-2000 and precipitation data is not bias corrected.



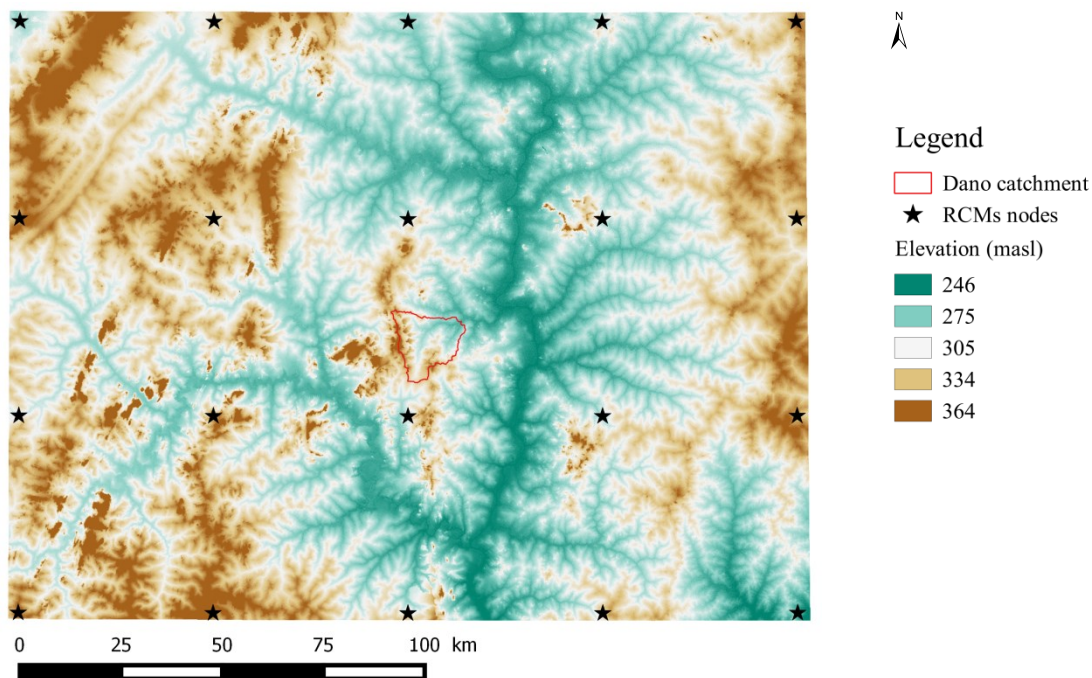

Supp\_Fig. 3 Topography of the RCM domain. Source : SRTM (<http://srtm.csi.cgiar.org>).

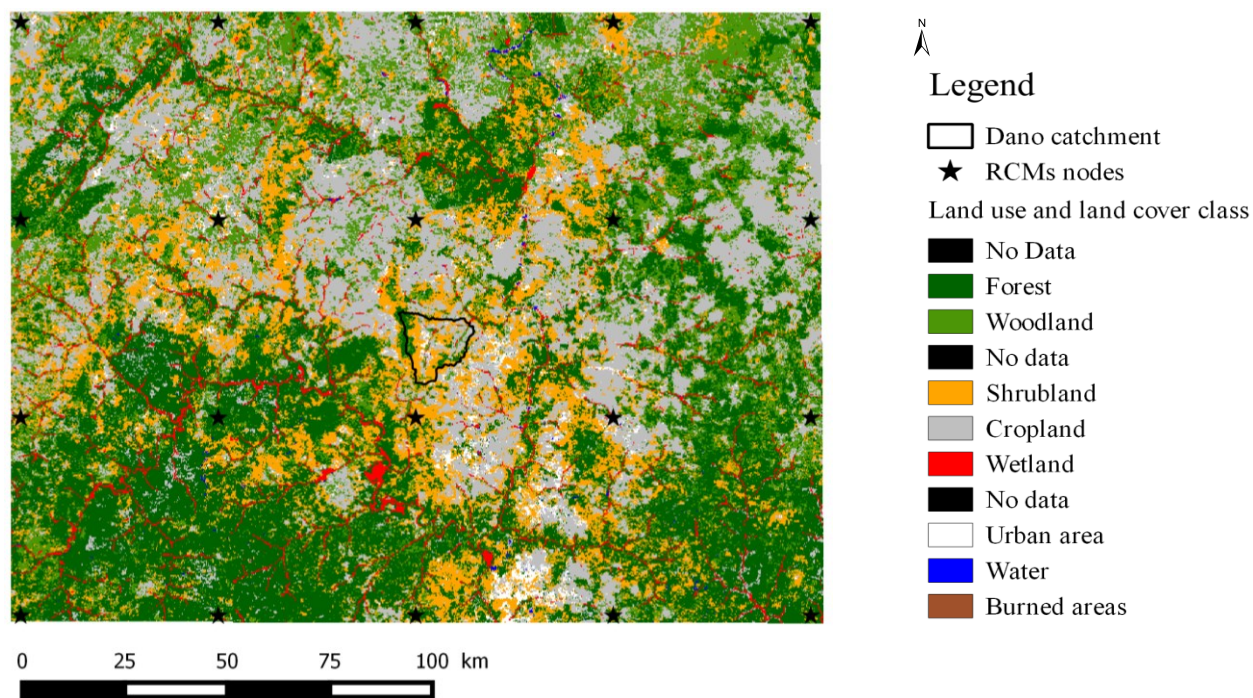

Supp\_Fig. 4 Land use and land cover map of the RCM domain. Source : Landmann et al. 2007 (<http://dx.doi.org/10.1109/IGARSS.2007.4424058>.)
